1 **SVEP1, a novel human coronary artery disease locus, promotes atherosclerosis**

2

3 In-Hyuk Jung<sup>1†</sup>, Jared S. Elenbaas<sup>1†</sup>, Arturo Alisio<sup>1</sup>, Katherine Santana<sup>1</sup>, Erica P. Young<sup>1,2</sup>, Chul Joo  
4 Kang<sup>2</sup>, Puja Kachroo<sup>3</sup>, Kory J. Lavine<sup>1</sup>, Babak Razani<sup>1,4</sup>, Robert P. Mecham<sup>5</sup>, Nathan O. Stitzziel<sup>1,2,6\*</sup>

5

6 <sup>1</sup>Center for Cardiovascular Research, Division of Cardiology, Department of Medicine, Washington  
7 University School of Medicine, Saint Louis, MO, USA.

8 <sup>2</sup>McDonnell Genome Institute, Washington University School of Medicine, Saint Louis, MO, USA

9 <sup>3</sup>Division of Cardiothoracic Surgery, Department of Surgery, Washington University School of Medicine,  
10 Saint Louis, MO, USA.

11 <sup>4</sup>Department of Pathology and Immunology, Washington University School of Medicine, Saint Louis,  
12 MO, USA

13 <sup>5</sup>Department of Cell Biology and Physiology, Washington University School of Medicine, Saint Louis,  
14 MO, USA

15 <sup>6</sup>Department of Genetics, Washington University School of Medicine, Saint Louis, MO, USA

16

17

18 <sup>†</sup>These authors contributed equally: In-Hyuk Jung, Jared Elenbaas

19 <sup>\*</sup>Correspondence should be addressed to Nathan O. Stitzziel. (e-mail: [nstitzziel@wustl.edu](mailto:nstitzziel@wustl.edu))

20

21

22

23

24

25

26

27

28 **Summary**

29 A low-frequency variant of SVEP1, an extracellular matrix protein, is associated with risk of coronary  
30 disease in humans independent of plasma lipids. Despite a robust statistical association, however, it was  
31 unclear if and how SVEP1 might contribute to atherosclerosis. Here, using Mendelian randomization  
32 and complementary mouse models, we provide evidence that SVEP1 promotes atherosclerosis in  
33 humans and mice. We find that SVEP1 is expressed by vascular smooth muscle cells (VSMCs) within  
34 the atherosclerotic plaque. VSMCs also interact with SVEP1, causing proliferation and dysregulation of  
35 key differentiation pathways, including integrin and Notch signaling. Fibroblast growth factor receptor  
36 transcription increases in VSMCs interacting with SVEP1, and is further increased by the coronary  
37 disease-associated SVEP1 variant. These effects ultimately drive inflammation and promote  
38 atherosclerosis. Taken together, our results suggest that VSMC-derived SVEP1 is a pro-atherogenic  
39 factor, and support the concept that pharmacological inhibition of SVEP1 should protect against  
40 atherosclerosis in humans.

41

42

43

44

45

46

47

48

49

## 50 Introduction

51 Cardiometabolic diseases are leading causes of morbidity and mortality and their prevalence is  
52 increasing (Dzau et al., 2002; Hansson and Klareskog, 2011; Liu and Ntambi, 2009; Rader and  
53 FitzGerald, 1998; Randolph, 2013; Ross, 1996; Virella and Lopes-Virella, 2003; Weber and Noels,  
54 2011). Although approved treatments can help ameliorate these diseases, residual disease risk remains a  
55 substantial problem. Statin medications, for example, lower plasma cholesterol levels and reduce risk of  
56 coronary events by 20-30% (C Baigent, 2005), highlighting both significant residual risk and an unmet  
57 need for identifying alternative treatment strategies. Human genetics is a powerful approach to uncover  
58 potential therapeutic targets and to date more than 160 loci (Deloukas et al., 2013; Nelson et al., 2017;  
59 Nikpay et al., 2015; Schunkert et al., 2011) have been robustly associated with coronary artery disease  
60 (CAD). At most loci, however, the causal gene is unknown, presenting a major bottle-neck and  
61 hindering the translation of these findings into new therapies. We previously performed a large-scale  
62 exome-wide association study of low-frequency protein altering variation and identified a highly  
63 conserved missense polymorphism in *SVEP1* (p.D2702G) that associated with an increased risk of CAD  
64 (Odds Ratio 1.14 per risk allele) (Stitzel et al., 2016). This CAD risk variant (hereto referred to as  
65 *SVEP1*<sup>CADrv</sup>) is not associated with an effect on plasma lipids but has a modest positive association with  
66 blood pressure and type 2 diabetes (Stitzel et al., 2016), suggesting this variant may broadly contribute  
67 to the progression of cardiometabolic disease.

68 *SVEP1*, also known as polydom, encodes a large extracellular matrix protein with sushi  
69 (complement control protein), von Willebrand factor type A, epidermal growth factor-like (EGF), and  
70 pentraxin domains (Gilges et al., 2000; Shur et al., 2006). This gene was originally discovered in a  
71 screen for Notch-interacting proteins, as it contains Notch-like repeat EGF-domains (Shur et al., 2006).  
72 The only protein currently known to directly interact with *SVEP1* is integrin  $\alpha 9\beta 1$  (Sato-Nishiuchi et al.,  
73 2012), a provisional matrix-binding integrin that is also linked to increased blood pressure in  
74 humans (Levy et al., 2009; Takeuchi et al., 2010). Integrin  $\alpha 9\beta 1$  binds to the same protein domain that  
75 harbors the variant residue in *SVEP1*<sup>CADrv</sup> (Sato-Nishiuchi et al., 2012) and both proteins also play  
76 critical roles in development, including lymphatic patterning (Karpanen et al., 2017; Samuelov et al.,  
77 2017).

78 Despite the strong statistical evidence linking *SVEP1* with CAD, its direct causality and  
79 associated mechanisms were unclear. Here, we sought to determine if and how *SVEP1* may influence  
80 the development of atherosclerosis. Given the overlapping disease associations between *SVEP1* and  
81 integrin  $\alpha 9\beta 1$ , their shared biological functions, and the proximity of the variant to integrin  $\alpha 9\beta 1$ 's

82 binding site, we focused our mechanistic studies on cell types that play a prominent role in  
83 atherosclerosis and express SVEP1 and/or integrin  $\alpha 9\beta 1$ .

84

## 85 **Results**

### 86 ***SVEP1* is expressed by arterial VSMCs under pathological conditions.**

87 To begin characterizing the role of SVEP1 in the pathogenesis of atherosclerosis, we sought to  
88 identify disease-relevant tissues and cell types that express *SVEP1*. Expression data from the Genotype-  
89 Tissue Expression (GTEx) project indicate that human arterial tissue, including coronary arteries,  
90 express *SVEP1* (Figure S1A). To confirm arterial expression, we used *in situ* hybridization on tissue  
91 explants from the aortic wall and internal mammary artery of patients with established coronary artery  
92 disease. *SVEP1* expression was readily detected within cells staining with the vascular smooth muscle  
93 cell marker, smooth muscle  $\alpha$ -actin (SM $\alpha$ -actin) (Figure 1A). VSMCs are known to increase synthesis of  
94 certain extracellular matrix proteins in response to various pathological stimuli (Cangemi et al., 2011);  
95 therefore, we assessed expression data from relevant disease specimens to determine if this also applies  
96 to SVEP1. Indeed, *SVEP1* expression is higher within human atherosclerotic tissue from carotid  
97 explants, relative to patient-paired adjacent and macroscopically intact tissue (Ayari and Bricca, 2013)  
98 (Figure S1B). Athero-prone arterial tissue explants from patients with diabetes also express higher levels  
99 of *SVEP1* compared to patients without diabetes (Cangemi et al., 2011) (Figure S1C).

100 We obtained mice expressing a lacZ reporter under the native *Svep1* promotor to determine  
101 whether murine *Svep1* expression recapitulated human *SVEP1* expression, and may therefore be a viable  
102 animal model to study its effects on disease. Within healthy arterial tissue of young mice, we observed  
103 low  $\beta$ -gal expression, mostly colocalizing with VSMCs (Figure 1B). These data are consistent with  
104 published single-cell studies that identify VSMCs within the healthy murine aorta as a minor source of  
105 *Svep1* expression (Kalluri et al., 2019) (Figure S1D). To determine if murine *Svep1* expression was  
106 increased in the development of atherosclerosis, as in humans, we assayed expression within mouse  
107 arterial tissue after the induction of atherosclerosis. Experimental atherosclerosis was induced by  
108 feeding atheroprone (*Apoe*<sup>-/-</sup>) mice a Western, high-fat diet (HFD) for 8 weeks. *Apoe*<sup>-/-</sup> mice fed a  
109 standard chow diet (CD) served as non-atherogenic controls. After 8 weeks of an atherogenic HFD, we  
110 observed a 2-fold increase in *Svep1* expression relative to CD fed control mice (Figure 1C, S1E). This  
111 expression was colocalized with neointimal cells that co-stained with SM $\alpha$ -actin, suggesting VSMC  
112 expression (Figure 1C).

113 Numerous cell types have been demonstrated to gain expression of VSMC markers in the context  
114 of atherosclerosis (Bennett et al., 2016). Therefore, to test the hypothesis that VSMC-derived cells  
115 within the neointima are the predominate source of *Svep1*, we generated *Apoe*<sup>-/-</sup> mice with VSMC-  
116 specific knockout of *Svep1* (*Svep1*<sup>fllox/fllox</sup>*Myh11-Cre*<sup>ERT2</sup>*Apoe*<sup>-/-</sup>; hereafter referred to as *Svep1*<sup>SMCΔΔ</sup>) and  
117 mice with unaltered *Svep1* expression (*Svep1*<sup>+/+</sup>*Myh11-Cre*<sup>ERT2</sup>*Apoe*<sup>-/-</sup>; hereafter referred to as  
118 *Svep1*<sup>SMC+/+</sup>), which served as controls. *Svep1* expression was assessed using *in situ* hybridization  
119 within the neointima of the aortic root of both groups after 8 weeks of HFD feeding. Indeed, while we  
120 observed robust *Svep1* expression in control mice, neointimal *Svep1* expression was nearly undetectable  
121 in *Svep1*<sup>SMCΔΔ</sup> mice (Figure 1D, S1F). These data indicate that VSMC-derived cells are the major source  
122 of *Svep1* in atherosclerotic plaque.

123 Given the increased expression of *Svep1* under atherosclerotic conditions in mice and humans,  
124 we tested the ability of atheroma-associated oxidized LDL (oxLDL) to directly induce *Svep1* expression  
125 in VSMCs. Exposure to oxLDL increased *Svep1* expression by 48% in primary VSMCs from  
126 *Svep1*<sup>SMC+/+</sup> mice but not *Svep1*<sup>SMCΔΔ</sup> mice, compared to vehicle-treated control cells (Figure 1E). Both  
127 *Svep1*<sup>SMC+/+</sup> and *Svep1*<sup>SMCΔΔ</sup> cells increased expression of *CD36*, indicating they were activated upon  
128 binding of oxLDL with its receptor (Wei Li, 2010).

129 Taken together, these data demonstrate that *SVEP1* is produced locally by VSMCs in  
130 atherosclerotic disease and are consistent with prior studies suggesting *SVEP1* is expressed by cells of  
131 mesenchymal origin (Karpanen et al., 2017; Morooka et al., 2017). Further, these data suggest that  
132 *SVEP1* may play a direct role in the pathogenesis of atherosclerosis and that mouse models are an  
133 appropriate means to interrogate this question.

134

### 135 ***Svep1* drives atherosclerotic plaque development**

136 To study the effect of *Svep1* on atherosclerosis, we fed *Apoe*<sup>-/-</sup> and *Svep1*<sup>+/-</sup>*Apoe*<sup>-/-</sup> mice (mice  
137 with homozygous *Svep1* deficiency die from edema at day E18.5 (Karpanen et al., 2017; Morooka et al.,  
138 2017) a HFD for 8 weeks and analyzed the resulting atherosclerotic plaque burden. There were no  
139 observed differences between genotypes in body weight, plasma total cholesterol, triglycerides, and  
140 glucose (Figure 2A, B). Relative to controls, however, *Svep1*<sup>+/-</sup>*Apoe*<sup>-/-</sup> mice had a significant reduction in  
141 plaque burden (as characterized by the percentage of surface area staining positive with Oil Red O) in  
142 the aortic arch and whole aorta by *en face* preparations, as well as in sectioned aortic roots (Figure 2C,  
143 D). *Svep1* deficiency also resulted in reduced macrophage staining within the aortic root neointima, as  
144 determined by the percentage of area staining positive for Mac3 (Figure 2E). We did not appreciate

145 marked differences in measures of plaque stability, such as area staining positive for VSMC markers or  
146 necrotic core size, although collagen content was modestly higher in atheromas from control mice  
147 compared to *Svep1*<sup>+/-</sup>*ApoE*<sup>-/-</sup> mice (Figure S2A-C).

148 We then tested the hypothesis that the atherogenic effects of *Svep1* could be attributed to its  
149 synthesis by VSMCs using *Svep1*<sup>SMCΔ/Δ</sup> and *Svep1*<sup>SMC+/+</sup> mice, as previously described. As with *Svep1*  
150 haploinsufficiency, loss of *Svep1* in VSMCs did not significantly alter body weight, plasma cholesterol,  
151 triglycerides and glucose levels (Figure 3A, B) following 8 weeks of HFD feeding. Also consistent with  
152 our *Svep1* haploinsufficiency model, *Svep1*<sup>SMCΔ/Δ</sup> mice had decreased plaque burden plaque in the aortic  
153 arch, whole aorta, and aortic root (Figure 3C, D), as compared to *Svep1*<sup>SMC+/+</sup> control mice.  
154 Additionally, atheromas from *Svep1*<sup>SMCΔ/Δ</sup> mice contained less macrophage staining and necrotic core  
155 area, indicators of plaque instability, and unaltered collagen content (Figure S3A-C).

156 Given the observations that loss of *Svep1* in VSMCs resulted in a dramatic reduction in plaque  
157 size in the setting of 8 weeks HFD feeding, we extended the length of plaque development to investigate  
158 the effect of *Svep1* on advanced plaque lesions. After treatment with tamoxifen, *Svep1*<sup>SMC+/+</sup> and  
159 *Svep1*<sup>SMCΔ/Δ</sup> mice were fed HFD for 16 weeks. Again, no differences were observed in body weight  
160 (Figure S3D), plasma cholesterol, and glucose levels (Figure S3E) between groups. Triglycerides were  
161 higher in the *Svep1*<sup>SMCΔ/Δ</sup> mice at a level of nominal significance ( $P = 0.046$ ), but this was not observed  
162 at other timepoints or in the haploinsufficiency model. Although we did not detect a statistically  
163 significant effect of VSMC-specific *Svep1* deletion on atherosclerotic plaque burden (Figure S3F, G),  
164 plaques from *Svep1*<sup>SMCΔ/Δ</sup> mice tended to be smaller and were both less complex and more stable than  
165 controls. These indicators of an altered plaque phenotype include decreased neointimal macrophage  
166 staining (Figure 3E) and necrotic core size (Figure 3F), in addition to greater collagen content (Figure  
167 3G). Taken together, these experimental atherosclerosis data suggest that *Svep1* drives atherosclerosis  
168 and increases plaque complexity.

## 169 170 **SVEP1 is causally related to cardiometabolic disease in humans**

171 Due to the relationship we discovered between *Svep1* depletion and reduced atherosclerosis  
172 across our mouse models, we wondered if the human SVEP1 CAD-associated D2072G missense  
173 polymorphism was associated with altered SVEP1 levels in humans. While we did not find that this  
174 allele (or other alleles in linkage disequilibrium) were associated with mRNA levels in GTEx (Figure  
175 S4A), we did find that the 2702G risk variant (SVEP1<sup>CADrv</sup>) was associated with a significant increase in  
176 circulating plasma SVEP1 protein levels ( $P = 8 \times 10^{-14}$ ; Figure 4A) as measured by two independent

177 aptamers (Figure S4B) from participants in the INTERVAL study (Sun et al., 2018), suggesting that  
178 increased SVEP1 protein levels were associated with increased risk of CAD. We next wondered if this  
179 was true for other genetic variants influencing SVEP1 protein levels. Using published data from the  
180 INTERVAL study (Sun et al., 2018), we cataloged *cis*-acting variants that associated with SVEP1  
181 protein levels at a genome-wide ( $P < 5 \times 10^{-8}$ ) level of statistical significance (Figure 4B). We  
182 performed Mendelian Randomization (Burgess et al., 2015) using a subset of these variants in linkage  
183 equilibrium ( $r^2 < 0.3$ ) and found that increased SVEP1 protein levels were causally related to increased  
184 CAD risk ( $P = 7 \times 10^{-11}$ ; Figure 4C, D). We also asked if SVEP1 protein levels were causally related to  
185 increased risk for hypertension and type 2 diabetes due to the prior associations we observed for the  
186 SVEP1<sup>CADrv</sup> allele with these risk factors. Indeed, we found that increased SVEP1 protein levels were  
187 causally related to both hypertension ( $P = 2 \times 10^{-15}$ ; Figure S4D) and type 2 diabetes ( $P = 0.0004$ ;  
188 Figure S4E).

189 To investigate how the human SVEP1<sup>CADrv</sup> missense polymorphism might impact CAD risk, we  
190 generated homozygous mice harboring the human SVEP1<sup>CADrv</sup> at the orthologous murine position  
191 (*Svep1*<sup>2699G/2699G</sup>; hereafter referred to as *Svep1*<sup>G/G</sup>). These mice were bred with *Apoe*<sup>-/-</sup> mice to generate  
192 *Svep1*<sup>G/G</sup>*Apoe*<sup>-/-</sup> mice. We were not able to detect differences in body weight, serum total cholesterol,  
193 triglycerides, and glucose (Figure S4E-H) between groups after feeding HFD. We also did not  
194 appreciate a significant difference between groups in the development of atherosclerotic plaque at either  
195 8 or 16 weeks of HFD feeding (Figure S4I, J). Although our prior human genetic study revealed a  
196 significant association with an increased risk of CAD, the effect of the SVEP1<sup>CADrv</sup> in humans was  
197 modest, in which each copy of the G allele was associated with a 14% increased risk of disease. If an  
198 effect size in mice is similarly modest, further investigation would require a very large number of  
199 animals, presenting both pragmatic and ethical barriers. To circumvent these concerns, subsequent  
200 functional interrogation of the SVEP1<sup>CADrv</sup> was performed *in vitro*.

201

## 202 **VSMCs express integrin $\alpha 9\beta 1$**

203 To begin characterizing the mechanism by which SVEP1 drives atherosclerosis, we sought to  
204 identify receptors and associated cell types that interact with SVEP1 in the extracellular space. Integrin  
205  $\alpha 9\beta 1$  is the only protein known to interact with *Svep1* and they colocalize *in vivo* (Sato-Nishiuchi et al.,  
206 2012). Integrins are transmembrane, heterodimeric receptors that respond to the extracellular  
207 environment and influence numerous aspects of atherosclerosis (Misra et al., 2018; Weng et al., 2003).  
208 Therefore, we hypothesized that integrin  $\alpha 9\beta 1$  (and associated cell-types) may be involved in *Svep1*-

209 mediated atherosclerosis. *ITGA9* is known to exclusively heterodimerize with *ITGB1*, therefore  
210 assessing *ITGA9* expression is a reliable proxy for integrin  $\alpha9\beta1$  expression. Integrin  $\alpha9\beta1$  expression  
211 has been documented in airway epithelium, smooth muscle, skeletal muscle, hepatocytes, and epithelial  
212 cells (Chen et al., 2012; Danussi et al., 2011; Gupta and Vlahakis, 2010; Kanayama et al., 2009;  
213 Mostovich et al., 2011; Roy et al., 2011; Sato-Nishiuchi et al., 2012; Schreiber et al., 2009), yet arterial  
214 tissue expresses the highest *ITGA9* levels of all GTEx tissues (Figure S5A). *In situ* hybridization  
215 confirmed that *ITGA9* is broadly expressed in the human aortic wall and LIMA, predominately  
216 colocalizing with VSMCs (Figure 5A). Likewise, VSMCs of the murine aorta expressed high levels of  
217 *Itga9* (Figure 5B). Consistent with these data, single cell studies of the murine aorta indicate the VSMCs  
218 express *Itga9* (Figure S5B) (Kalluri et al., 2019). Given the established role of VSMCs in CAD (Bennett  
219 et al., 2016), their expression of integrin  $\alpha9\beta1$ , and the local expression patterns of *Svep1* in disease, we  
220 tested the hypothesis that VSMCs respond to *Svep1* in a cell-autonomous manner to promote  
221 atherosclerosis.

## 222

### 223 ***Svep1* induces proliferation and integrin signaling in VSMCs**

224 The ECM plays a critical role in orchestrating cellular responses to tissue injury, including  
225 promoting cell proliferation and differentiation (Bennett et al., 2016; Johnson, 2014). We therefore  
226 assessed the proliferation of neointimal *Svep1*<sup>SMC $\Delta\Delta$</sup>  and *Svep1*<sup>SMC +/+</sup> VSMCs using immunofluorescent  
227 staining of the proliferation marker, mini-chromosome maintenance protein-2 (MCM-2). Among cells  
228 expressing smooth muscle actin, fewer stained positive for MCM-2 in *Svep1*<sup>SMC $\Delta\Delta$</sup>  mice as compared to  
229 *Svep1*<sup>SMC +/+</sup> controls after HFD feeding for 8 weeks (Figure 5C), suggesting *Svep1* induces VSMC  
230 proliferation.

231 To further explore the effects of *Svep1* on VSMCs, we generated and purified recombinant  
232 *Svep1* and its orthologous CAD risk variant (*Svep1*<sup>CADrv</sup>) using a mammalian expression system. We  
233 tested the response of primary VSMCs to *Svep1* that was immobilized on culture plates, reflecting an  
234 overexpression-like assay while maintaining its physiologic context as an extracellular matrix protein (in  
235 contrast to genetic overexpression). VSMCs adhere to *Svep1* in a dose dependent manner (Figure 5D).  
236 Exposure to both *Svep1* variants induces dose-dependent VSMC proliferation, based on BrdU  
237 incorporation (Figure 5E). As a point of reference, we used oxLDL, a proliferative stimulus relevant to  
238 atherosclerosis, in addition to *Svep1* to test VSMC proliferation. Strikingly, *Svep1* was able to induce  
239 more VSMC proliferation than oxLDL. Exposure to a combination of oxLDL and *Svep1*, as exists  
240 within the atheromatous environment, caused the greatest amount of VSMC proliferation (Figure 5F).



241 Murine macrophages exposed to Svep1 do not proliferate in the absence or presence of oxLDL (Figure  
242 S5C) suggesting that Svep1 is not a proliferative stimulus for all cell types.

243 Integrin  $\alpha 9\beta 1$  is expressed by VSMCs, binds to Svep1, and drives proliferation in some cell  
244 types (Schreiber et al., 2009). Therefore, to begin to interrogate the molecular mechanisms by which  
245 Svep1 influences VSMCs, we tested whether Svep1 exposure was able to induce integrin signaling in  
246 VSMCs. We tested this by seeding cells to wells coated with bovine serum albumin (as an inert protein  
247 control), VCAM-1 (a low affinity integrin  $\alpha 9\beta 1$  ligand), or Svep1 (a high affinity integrin  $\alpha 9\beta 1$  ligand).  
248 We found that cells adherent to Svep1 had increased phosphorylation of canonical integrin signaling  
249 kinases, such as focal adhesion kinase (FAK), Paxillin (Pax), and Src, as well as downstream MAPK  
250 kinases, ERK and p38 (Figure 5G), relative to an inert protein control. Svep1<sup>CADrv</sup> had similar effects as  
251 Svep1 on integrin signaling in VSMCs (Figure S5D). We then tested if Svep1-induced proliferation was  
252 dependent on integrin  $\alpha 9\beta 1$ . Since *Itga9* exclusively heterodimerizes with *Itgb1*, we used siRNA  
253 knockdown of *Itga9* to disrupt integrin  $\alpha 9\beta 1$ . The proliferative effect of Svep1 was completely inhibited  
254 by knockdown of *Itga9* using two different siRNA constructs (Figure 5H), suggesting that integrin  $\alpha 9\beta 1$   
255 is necessary for Svep1-induced VSMC proliferation.

256

### 257 **Svep1 regulates key VSMC differentiation pathways**

258 We next sought to characterize the response of primary VSMCs to the wildtype Svep1 and  
259 Svep1<sup>CADrv</sup> proteins using an unbiased methodology. Cells were collected after 20 hours of growth on  
260 the indicated substrate and transcriptomic analysis was performed using RNA-sequencing. Pathway and  
261 gene ontology analysis was used to determine the shared and unique transcriptional response to the  
262 Svep1 variants. Consistent with previous findings, a number of cell adhesion and proliferation-related  
263 pathways and terms were enriched in the shared transcripts of cells exposed to either Svep1 variant.  
264 These include ECM-receptor interaction, focal adhesion, integrin-mediated signaling, positive regulation  
265 of cell proliferation, and various additional proliferative and mitogenic pathways (Figure 6A, B,  
266 Supplemental Table 1). A striking number of differentiation and development-related pathways and  
267 terms were also enriched in cells exposed to the Svep1 variants. These include angiogenesis, cell  
268 differentiation, and wound healing, among many others (Figure 6A, B, Supplemental Table 1).

269 Svep1 contains numerous different and repeating domains that are known to play critical  
270 developmental roles and may therefore be governing the effects of Svep1 on VSMCs. Further, although  
271 *Svep1*<sup>-/-</sup> and *Itga9*<sup>-/-</sup> mice have similar phenotypes of edema and lymphatic defects (Karpanen et al.,  
272 2017; Morooka et al., 2017), the phenotype of *Svep1*<sup>-/-</sup> mice is markedly more severe (death by E18.5 vs

273 P12 (Huang et al., 2000)), suggesting *Itga9* may have partial redundancy with an additional receptor(s)  
274 for Svep1. To search for evidence of additional domain interactions, we cross-referenced the  
275 transcriptional profile of VSMCs to the Svep1 variants with InterPro (Mitchell et al., 2019), a database  
276 of protein domains. In addition to integrin-related domains, transcripts that code for EGF-like domain-  
277 containing proteins were highly differentially expressed in cells exposed to Svep1 (Figure 6C). Repeat  
278 EGF-like domains often interact, as occurs in Notch signaling, suggesting Svep1's repeat EGF-like  
279 domains may be playing an important, but as of yet undescribed role in the biological function of Svep1  
280 (Mitchell et al., 2019). Indeed, transcripts related to Notch signaling were dysregulated in cells exposed  
281 to Svep1 (Figure 6A).

282 As an orthogonal approach to interrogating SVEP1's mechanisms and potential binding partners,  
283 we sought to identify homologues in distantly related species. The *Drosophila* protein, uninflatable, is a  
284 potential orthologue of SVEP1 (Sonnhammer and Ostlund, 2015) and contains a region defined by three  
285 ephrin-receptor like domains, followed by tandem EGF-repeats and a Laminin-G domain (Marchler-  
286 Bauer et al., 2011), mirroring a region of SVEP1 that contains a highly similar sequence of domains.  
287 Inhibition of uninflatable in *Drosophila* larvae results in defective tracheal development, analogous to  
288 the vascular defects observed in zebrafish Svep1 mutants (Ghabrial and Krasnow, 2006; Zhang and  
289 Ward, 2009). Uninflatable has been shown to bind and modulate Notch signaling in *Drosophila*  
290 (Loubery et al., 2014; Xie et al., 2012; Zhang and Ward, 2009). These findings, in addition to the  
291 RNAseq analysis, led us to hypothesize that Svep1 may also modulate Notch signaling.

292 VSMCs express multiple Notch receptors (Davis-Knowlton et al., 2019), thus, we tested the  
293 impact of Svep1 on Notch signaling in VSMCs. This was assessed by seeding VSMCs on tissue culture  
294 plates treated with Svep1 or BSA (as an inert control protein) for 4 hours, since Notch signaling is  
295 highly temporally regulated (Schweisguth, 2004). Cells grown on Svep1 had significantly increased  
296 expression of canonical Notch targets *Hey2* and *Hes1* even without overexpression of a Notch receptor  
297 (Figure 6D). Conversely, primary VSCMs collected from *Svep1*<sup>SMCΔΔ</sup> mice have decreased transcription  
298 of Notch target genes (Figure 6E), supporting the regulation of Notch signaling by Svep1. Svep1-  
299 induced proliferation was also completely abrogated upon Notch inhibition by the  $\gamma$ -secretase inhibitor,  
300 DAPT (Figure 6F). Cell proliferation in response to 10% fetal bovine serum was not significantly  
301 inhibited by DAPT (data not shown), demonstrating that Notch signaling is necessary for Svep1-induced  
302 proliferation. It is possible that Notch and integrin receptors may cooperatively regulate the effects of  
303 SVEP1, similar to that reported on non-canonical ECM Notch regulators MAGP2 and EGFL7 (Deford  
304 et al., 2016).

## 305 **VSMCs differentially respond to *Svep1*<sup>CADrv</sup> compared to *Svep1***

306 Our experimental atherosclerosis models and Mendelian Randomization analysis indicate that  
307 both SVEP1 variants are atherogenic, with *Svep1*<sup>CADrv</sup> having the greater atherogenicity of the two. We  
308 therefore interrogated the differential transcriptional responses of VSMCs to the *Svep1* variants. This  
309 analysis also revealed that a large number of proliferation-related pathways were disproportionately  
310 regulated by the variants (Figure 6G, H, Supplementary Table 1). Further exploration revealed that the  
311 fibroblast growth factor (FGF) receptor family was differentially expressed between the variants. The  
312 FGFR family is also sub-categorized within several of the most differentially regulated pathways and  
313 terms. FGF signaling is proatherogenic in VSMCs (Chen et al., 2016), so we assessed the effect of each  
314 variant on the direction and magnitude of transcription of each FGF receptor expressed by VSMCs.  
315 Consistent with their relative atherogenicities, SVEP1 increases expression of FGF receptors but  
316 exposure to *Svep1*<sup>CADrv</sup> resulted in significantly higher expression of FGF receptors (Figure 6I). These  
317 data suggest that increased FGF signaling may contribute to the increased CAD risk associated with  
318 *SVEP1*<sup>CADrv</sup>.

319 Given the fundamental role of integrin, Notch, and FGFR signaling in regulating VSMC  
320 phenotype, we assessed the effects of *Svep1* in response to oxLDL, an inflammatory stimulus relevant to  
321 atherosclerosis. Upon oxLDL stimulation, both *Svep1*<sup>SMC+/+</sup> and *Svep1*<sup>SMCΔ/Δ</sup> VSMCs decreased the  
322 expression of contractile markers *Myh11* and *Sma-actin* (Figure 6J), while increasing expression of the  
323 inflammatory markers *Il-6* and *Ccl2* (Figure 6K), confirming an inflammatory response to oxLDL.  
324 *Cxcl1*, *Il-6*, and *Ccl2* expression was lower in *Svep1*<sup>SMCΔ/Δ</sup> VSMCs than *Svep1*<sup>SMC+/+</sup> controls, suggesting  
325 that *Svep1* may be a pro-inflammatory stimulus VSMCs under atherosclerotic conditions.

326

## 327 ***Svep1* promotes inflammation in atherosclerosis**

328 To investigate how the loss of *Svep1* influences pathways involved in the development of  
329 atherosclerosis at the tissue level, we performed RNA-seq analyses on mRNA extracted from aortic  
330 arches of *Svep1*<sup>SMC+/+</sup> and *Svep1*<sup>SMCΔ/Δ</sup> mice after 8 weeks of HFD. Loss of *Svep1* in VSMCs altered a  
331 number of inflammatory pathways upon induction of atherosclerosis. These include cytokine-cytokine  
332 receptor interaction, chemokine signaling, and NF-kappa B signaling pathways (Figure 7A, B). Notably,  
333 both cell adhesion molecules (CAMs) and ECM-receptor interaction were also dysregulated in the  
334 atherosclerotic aortic arches from *Svep1*<sup>SMCΔ/Δ</sup> (Figure 7A, B and Supplementary Table 2). Quantitative  
335 PCR using cDNA from the aortic arches of the same mice was used to validate the RNA-seq results.  
336 Specifically, *Ccl2* (C-C motif chemokine ligand 2), *Spp1* (secreted phosphoprotein 1, also known as

337 osteopontin), and *Cxcl5* (C-X-C motif chemokine ligand 5) were significantly decreased in *Svepl*<sup>SMC $\Delta$  $\Delta$</sup>   
338 mice, as compared to *Svepl*<sup>SMC $^{+/+}$</sup>  mice (Figure S6A). Despite these differences, we did not find a  
339 significant alteration in circulating inflammatory mediators in these mice, suggesting *Svepl* influences  
340 local tissue inflammation but not systemic inflammation (Figure S6B). These data are also consistent  
341 with our observations that *Svepl* depletion decreases neointimal macrophage staining in atherosclerotic  
342 plaque.

343 Integrins play a critical role in the immune response, we therefore asked whether immune cells  
344 may also express integrin  $\alpha 9\beta 1$  and interact with SVEP1 in atherosclerosis. In human peripheral blood  
345 cells, moderate integrin  $\alpha 9\beta 1$  expression was detected by neutrophils and low expression was detected  
346 by CD14<sup>low</sup>CD16<sup>+</sup> non-classical, CD14<sup>high</sup>CD16<sup>+</sup> intermediate, and CD14<sup>+</sup>CD16<sup>-</sup> classical monocytes  
347 (Figure S7A) as previously reported (Shang et al., 1999). Given that monocytes significantly alter their  
348 expression profiles upon tissue entry and differentiation into macrophages (Chistiakov et al., 2015), we  
349 sought to test if macrophages in atherosclerotic plaque express *ITGA9*. Indeed, *ITGA9* expression was  
350 detected in CD68<sup>+</sup> macrophages within human atherosclerotic plaque by *in situ* hybridization (Figure  
351 S7B).

352 We then sought to further assess the expression of integrin  $\alpha 9\beta 1$  expression in circulating murine  
353 leukocyte subsets. High expression of integrin  $\alpha 9\beta 1$  was detected in both Ly6C<sup>hi</sup> and Ly6C<sup>low</sup> monocytes  
354 and we could detect low levels in neutrophils (Figure 7C). These expression patterns were unaltered in  
355 heterozygous *Svepl* deficiency (Figure S7C) and we did not observe an induction of integrin  $\alpha 9\beta 1$   
356 expression upon oxLDL treatment in any cell type tested (Figure S7D, E). Considering the finding that  
357 integrin  $\alpha 9\beta 1$  is expressed by monocyte subsets in peripheral mouse blood, we further analyzed its  
358 expression in myeloid cells from the aortas of *Apoe*<sup>-/-</sup> and *Svepl*<sup>+/-</sup>*Apoe*<sup>-/-</sup> mice following 8 weeks of  
359 HFD feeding. We discovered that integrin  $\alpha 9\beta 1$  was expressed in both macrophages and Ly6C<sup>hi</sup>  
360 monocytes of these mice (Figure 7D), consistent with human expression data. We similarly detected  
361 robust expression of *Itga9* by neointimal macrophages using *in situ* hybridization (Figure 7E).

362 Since integrin  $\alpha 9\beta 1$  is expressed on monocytes/macrophages, we sought to better understand  
363 whether *Svepl* could be directly interacting with integrin  $\alpha 9\beta 1$  on these cells. To test this, we generated  
364 mice with myeloid cell lineage-specific knockout of *Itga9* using *LysM-Cre* (*Itga9*<sup>fl $ox$ /fl $ox$</sup> *LysM-Cre*,  
365 hereafter referred to as *Itga9*<sup>MAC $\Delta$  $\Delta$</sup> ). *Itga9*<sup>+/+</sup>*LysM-Cre* mice, referred to as *Itga9*<sup>MAC $^{+/+}$</sup> , served as  
366 controls. First, we confirmed that bone marrow derived macrophages from *Itga9*<sup>MAC $\Delta$  $\Delta$</sup>  animals had a  
367 significant reduction in the amount of integrin  $\alpha 9\beta 1$  that was present on the cell surface (Figure 7F). We  
368 then tested the ability of peritoneal macrophages from these animals to migrate in response to *Svepl*

369 using a trans-well migration assay. Svep1 exposure induced a dose-dependent trans-well migration of  
370 macrophages from *Itga9<sup>MAC+/+</sup>* control animals but not from *Itga9<sup>MACΔ/Δ</sup>* mice (Figure 7G). This suggests  
371 that Svep1 and integrin  $\alpha 9\beta 1$  may directly interact to augment myeloid cell homing or migration.  
372 Consistent with this, THP-1 cells, a human monocytic cell line, adhered to Svep1 in a dose-dependent  
373 manner (Figure S7F, G). Integrin signaling was also activated in THP-1 cells upon exposure to Svep1 or  
374 Svep1<sup>CADrv</sup> and no differences were observed between the variants (Figure S7G).

375 To test if Svep1 had similar effects on leukocytes *in vivo*, we performed an *in vivo* monocyte  
376 recruitment assay in *Svep1<sup>SMC+/+</sup>* and *Svep1<sup>SMCΔ/Δ</sup>* mice. After 8 weeks of HFD feeding, we injected  
377 yellow/green (YG) latex beads intravenously in order to label circulating Ly6C<sup>low</sup> monocytes. Flow  
378 cytometry was performed three days after intravenous bead injection (to confirm labeling) and the aortic  
379 tissues were isolated for histology on the fourth day following bead injection (to assess recruitment). We  
380 confirmed that YG beads were preferentially labeled on Ly6C<sup>low</sup> monocytes and not on Ly6C<sup>high</sup>  
381 monocytes, indicating efficient bead labeling of circulating monocytes (Figure S7H). We did not  
382 observe a difference between groups in the efficiency of bead labeling for monocyte subsets (Figure  
383 S7I). Next, we quantified the number of labeled monocytes recruited into atherosclerotic plaques of  
384 aortic roots using fluorescent microscopy. *Svep1<sup>SMCΔ/Δ</sup>* mice had significantly fewer YG beads per  
385 atheroma, with or without normalization to the percentage of labeled monocytes, relative to *Svep1<sup>SMC+/+</sup>*  
386 mice (Figure 7H).

387 Taken together, these data support Svep1's role in promoting inflammation in atherosclerosis,  
388 either indirectly by promoting an inflammatory VSMC phenotype, directly by interacting with integrin  
389  $\alpha 9\beta 1$  on circulating or tissue leukocytes, or a combination of these processes.

390

## 391 Discussion

392 Human genomic studies hold great promise in identifying therapeutic targets for disease (Young  
393 and Stitzel, 2019), but a significant limitation in translating their findings is the identification of specific  
394 causal genes that underlie the observed statistical associations. In a previous study, we identified a low-  
395 frequency polymorphism in *SVEP1* that robustly associated with coronary artery disease risk in humans  
396 (Stitzel et al., 2016), but it was not clear if *SVEP1* was the causal gene in the locus. Here, we present the  
397 first report that SVEP1 is causal in coronary artery disease using experimental mouse models and  
398 Mendelian Randomization.

399 Atherosclerosis is a complex, multifactorial disease process with numerous cell types playing a  
400 role in its pathogenesis. This presents an arduous challenge when validating genomic risk loci and

401 testing their mechanisms. The SVEP1<sup>CADrv</sup> does not associate with changes in plasma lipid levels  
402 (Stitzel et al., 2016), prompting us to explore how SVEP1 might influence other aspects of disease  
403 pathogenesis. We used human and mouse expression data at the cell and tissue level to develop  
404 mechanistic hypotheses, which we then tested using *in vivo* and *in vitro* approaches. Specifically, high  
405 basal arterial expression of both *SVEP1* and *ITGA9*, and increased SVEP1 expression under pathological  
406 conditions, led us to hypothesize that these proteins may influence local disease processes. Upon  
407 exposure to various pathologic stimuli, VSMCs can undergo a “phenotype shift”, in which they lose  
408 their quiescent, contractile properties and become migratory, proliferative, inflammatory, and synthetic  
409 (Basatemur et al., 2019; Bennett et al., 2016). VSMCs gain properties of matrix-synthesizing fibroblasts  
410 during atherosclerosis (Wirka et al., 2019), making VSMCs our primary candidates for the source of  
411 SVEP1 within atherosclerotic plaque. Our results provide strong evidence that atherogenic SVEP1 is  
412 indeed synthesized by VSMC-derived cells within the atherosclerotic plaque.

413 We then used expression of *ITGA9* to identify disease-relevant cell types that may respond to  
414 SVEP1. This led to the hypothesis that SVEP1 may be interacting with VSMCs by an autocrine  
415 mechanism or monocytes by a paracrine mechanism to promote atherosclerosis. VSMCs play a  
416 particularly complex and intriguing role in atherosclerosis and warrant further discussion. Recent  
417 lineage tracing studies have challenged the notion that VSMCs play a protective role in atherosclerosis  
418 (Bennett et al., 2016) by demonstrating that a large, heterogenous population of cells within plaque are  
419 derived from VSMCs (Basatemur et al., 2019; Bennett et al., 2016; Shankman et al., 2015).  
420 Furthermore, numerous CAD risk loci have now been linked to VSMCs (Liu et al., 2018). This study  
421 demonstrates that SVEP1 profoundly influences the behavior of VSMCs by regulating a number of  
422 pathways with vital roles in VSMC biology. These pathways include integrin, Notch, and FGFR  
423 signaling, each of which has been shown to contribute to atherosclerosis (Boucher et al., 2012; Chen et  
424 al., 2016; Fukuda et al., 2012; Misra et al., 2018). Recent studies have provided novel insights into the  
425 regulation of VSMC phenotype in atherosclerosis by various transcription factors (Cherepanova et al.,  
426 2016; Shankman et al., 2015; Wirka et al., 2019). The ECM also plays a fundamental role in regulating  
427 VSMC phenotype and is amenable to pharmacologic intervention. Current strategies for the treatment  
428 and prevention of CAD consist of lowering risk factors, such as plasma lipids, yet substantial residual  
429 risk remains despite effective treatment. Intervening on VSMCs may be a powerful complimentary  
430 approach to these traditional therapies.

431 In addition to its association with CAD, our Mendelian randomization results suggest that  
432 circulating SVEP1 causally underlies risk of hypertension and type 2 diabetes. Although the source of

433 SVEP1 in human plasma is unknown, other ECM proteins have been detected in the circulation of  
434 patients with atherosclerosis, suggesting that plasma levels of these proteins may reflect tissue levels and  
435 atherosclerotic remodeling (Langley et al., 2017; Sundstrom and Vasan, 2006). The mechanisms by  
436 which the genetic variants used in the Mendelian randomization affect plasma SVEP1 levels is unclear.  
437 Two reasonable hypotheses include modification of protein secretion or degradation, however further  
438 studies will be required to determine these mechanisms. Regardless, the power of the two sample  
439 Mendelian randomization framework is that these alleles are allocated randomly at birth and are  
440 associated with SVEP1 levels in the absence of disease, suggesting that the presence of disease is not  
441 driving altered SVEP1 levels, but rather that altered SVEP1 levels are causally related to disease. This  
442 further suggests that circulating SVEP1 levels have the potential to be useful as a predictive biomarker.

443 Additional human genetic data also supports a broader role of SVEP1 in cardiometabolic disease.  
444 The alpha subunit of integrin  $\alpha 9\beta 1$ , which binds to SVEP1 (Sato-Nishiuchi et al., 2012) with an affinity  
445 that far exceeds its other known ligands (Andrews et al., 2009; Hakkinen et al., 2000; Nishimichi et al.,  
446 2009; Smith et al., 1996), is also associated with blood pressure in multiple studies (Levy et al., 2009;  
447 Takeuchi et al., 2010). Overexpression of disintegrin and metalloproteinase with thrombospondin  
448 motifs-7 (ADAMTS-7), another CAD risk locus, in primary rat VSMCs alters the molecular mass of  
449 SVEP1 (Kessler T, 2015). The overlapping disease associations and molecular interactions between  
450 these three risk loci converge on SVEP1 and point to a regulatory circuit with a prominent, yet  
451 unexplored role in cardiometabolic disease. Further studies will be required to validate their interactions  
452 and mechanisms *in vivo*, and to explore the potential of targeting this pathway for the treatment of  
453 cardiometabolic disease.

454 Our complementary mouse models demonstrate that *Svep1* haploinsufficiency and VSMC-  
455 specific *Svep1* deficiency significantly abrogate the development of atherosclerosis. Each intervention  
456 was well tolerated by mice, as we did not observe any adverse response to *Svep1* depletion. Similarly,  
457 our Mendelian Randomization analyses suggest there may be a therapeutic window to safely target  
458 SVEP1 levels. These findings suggest that targeting SVEP1 or selectively modulating its interactions  
459 may be a viable strategy for the treatment and prevention of coronary artery disease.

460 **Figures**

461

462 **Figure 1. *SVEPI* is expressed by VSMCs under pathological conditions.**

463 (A) Expression of *SVEPI* in human aortic wall and LIMA cross-sections from patients using ISH.

464 (B)  $\beta$ -gal expression in the aortic root, BCA (brachiocephalic artery), LC (lesser curvature) from 8-  
465 week-old *Svep1*<sup>+/-</sup>*ApoE*<sup>-/-</sup> and *ApoE*<sup>-/-</sup> mice.

466 (C) Expression of *Svep1* using ISH in aortic root from young (8-week-old), CD fed and 8 weeks of HFD  
467 fed *ApoE*<sup>-/-</sup> and *Svep1*<sup>+/-</sup>*ApoE*<sup>-/-</sup> mice.

468 (D) Expression of *Svep1* using ISH in the aortic root from *Svep1*<sup>SMC+/+</sup> and *Svep1*<sup>SMC $\Delta$ / $\Delta$</sup>  mice after 8  
469 weeks of HFD feeding. Outlined areas indicate the regions magnified in the next panels. Tissues in (A-  
470 D) were co-stained with the VSMC marker, SM $\alpha$ -actin. Scale bars, 50  $\mu$ m. M, media; L, lumen; P,  
471 plaque.

472 (E) *Svep1* expression of primary VSMCs from *Svep1*<sup>SMC+/+</sup> and *Svep1*<sup>SMC $\Delta$ / $\Delta$</sup>  mice with or without the  
473 addition of oxLDL for 48 hr. Increased expression of CD36, the oxLDL receptor, confirms VSMC  
474 stimulation. \*\*\* $P < 0.001$ ; \*\*\*\* $P < 0.0001$ . Mann-Whitney test was used.

475

476 **Figure 2. *Svep1* haploinsufficiency abrogates atherosclerosis.**

477 (A) Body weight of *ApoE*<sup>-/-</sup> and *Svep1*<sup>+/-</sup>*ApoE*<sup>-/-</sup> mice during HFD feeding ( $n = 13-14$ /group).

478 (B) Plasma total cholesterol ( $n = 7-10$ ), triglycerides, and glucose ( $n = 12-13$ /group).

479 (C) *En face* Oil Red O-stained aortas. Outlined areas indicate the aortic arch regions magnified in left  
480 panels. Quantification of Oil Red O-stained area in each aortic arch and whole artery ( $n = 15-17$ /group).

481 (D) Oil Red O-stained aortic root cross-sections. Quantification of Oil Red O-stained area ( $n = 15-  
482 17$ /group). Scale bar, 500  $\mu$ m.

483 (E) Mac3 staining in aortic root sections. Quantification of Mac3 as a percentage of plaque area ( $n = 11-  
484 12$ /group). Scale bar, 200  $\mu$ m. M, media; L, lumen; P, plaque. One-way ANOVA test (A) or Unpaired  
485 nonparametric Mann-Whitney test were used (B through E), and shown as the mean  $\pm$  SEM. \* $P < 0.05$ ;  
486 \*\* $P < 0.01$ ; NS, not significant.

487

488 **Figure 3. VSMC-specific *Svep1* deficiency reduces atherogenesis and plaque complexity.**

489 (A) Body weight of *Svep1*<sup>SMC+/+</sup> and *Svep1*<sup>SMC $\Delta$ / $\Delta$</sup>  mice during HFD feeding.

490 (B) Total plasma cholesterol, triglycerides, and glucose.



491 (C) *En face* Oil Red O-stained aortas. Outlined areas indicate the aortic arch regions magnified in left  
492 panels. Quantification of Oil Red O-stained area in each aortic arch and whole artery.  
493 (D) Oil Red O-stained aortic root cross-sections. Quantification of Oil Red O-stained area. Scale bar,  
494 500  $\mu\text{m}$ .  $n = 13\text{-}15/\text{group}$  (A through D).  
495 (E) Mac3 staining of aortic roots. Quantification of Mac3 as a percentage of plaque area.  
496 (F) Necrotic core outlined on H&E-stained sections.  
497 (G) Collagen staining using by Masson's trichrome stain. (E through G) All values were calculated as a  
498 percentage of plaque area. Scale bars, 200  $\mu\text{m}$ .  $n = 8\text{-}9/\text{group}$ . M, media; L, lumen; P, plaque. One-way  
499 ANOVA test (A) or Unpaired nonparametric Mann-Whitney test were used (B through G), and shown  
500 as the mean  $\pm$  SEM. \* $P < 0.05$ ; \*\* $P < 0.01$ ; \*\*\* $P < 0.001$ ; NS, not significant.

501

502 **Figure 4. Plasma levels of SVEP1 are causally related to CAD in humans.**

503 (A) The effect of the CAD-associated SVEP1 D2702G allele on plasma SVEP1 levels. Effect refers to  
504 the change per alternative allele (ending 2702G) in units of normalized protein levels after adjusting for  
505 covariates as previously described (Sun et al., 2018).

506 (B) Genome-wide Manhattan plot for variants associated with plasma SVEP1. The  $-\log_{10}(p)$  of the  
507 association with SVEP1 levels is plotted for each variant across the genome according to chromosomal  
508 position (X-axis). The red line indicates genome-wide significance ( $P < 5 \times 10^{-8}$ ). The association peak  
509 on chromosome 9 overlies the *SVEP1* locus.

510 (C) Estimated effect (with 95% confidence intervals) of each variant included in the Mendelian  
511 Randomization analysis on plasma SVEP1 level and CAD risk. The red line indicates the causal effect  
512 estimate ( $P = 7 \times 10^{-11}$ ).

513 (D) The estimated causal effect (with 95% confidence intervals) of each SNP included in the Mendelian  
514 Randomization analysis for a one unit increase in SVEP1 level is plotted along with the overall  
515 summary estimate from the causal analysis.

516

517 **Figure 5. Svep1 induces Itga9-dependent proliferation in VSMCs.**

518 (A) *ITGA9* expression in human aortic wall and LIMA cross-sections from patients using ISH. M,  
519 media; L, lumen.

520 (B) Expression of *Itga9* in the aortic root from 8-week-old *Svep1*<sup>SMC<sup>+/+</sup></sup> and *Svep1*<sup>SMC $\Delta/\Delta$</sup>  mice using ISH.  
521 Outlined areas indicate the regions magnified in the next panels. Scale bar, 50  $\mu\text{m}$ .

522 (C) MCM-2 immunofluorescent staining of aortic root regions from *Svep1*<sup>SMC<sup>+/+</sup></sup> and *Svep1*<sup>SMC<sup>Δ/Δ</sup></sup> mice  
523 after 8 weeks of HFD feeding. Yellow arrows indicate MCM-2<sup>+</sup>/SM $\alpha$ -actin<sup>+</sup> cells within plaque.  
524 Quantification of MCM-2<sup>+</sup>/SM $\alpha$ -actin<sup>+</sup> cells (n = 13-15/group). Scale bars = 50  $\mu$ m. Tissues in (A-C)  
525 were co-stained with the VSMC marker, SM $\alpha$ -actin.  
526 (D) Adhesion of VSMCs to increasing concentrations of immobilized Svep1. Adhered cells were  
527 counted manually and normalized to wells lacking Svep1.  
528 (E) Proliferation of VSMCs in response to increasing concentrations of immobilized Svep1 and  
529 Svep1<sup>CADrv</sup> using a BrdU incorporation assay.  
530 (F) *Svep1*<sup>SMC<sup>Δ/Δ</sup></sup> VSMCs were incubated in wells precoated with 30  $\mu$ g ml<sup>-1</sup> Svep1 protein or BSA (as  
531 vehicle control) and treated with or without 50  $\mu$ g ml<sup>-1</sup> oxLDL in the culture media for 36 hr.  
532 Proliferation was determined by BrdU incorporation. Two-tailed t-test.  
533 (G) Immunoblots of integrin signaling kinases and downstream kinases of cells adhered to control,  
534 VCAM-1, or Svep1-treated plates.  $\beta$ -actin was used as loading control.  
535 (H) VSMCs were transfected with control or *Itga9*-targetted siRNAs and grown on immobilized Svep1  
536 or BSA. Proliferation was determined by BrdU incorporation. \**P* < 0.05; \*\*\**P* < 0.001; \*\*\*\**P* <  
537 0.0001. Two-tailed t-test.

538

### 539 **Figure 6. Svep1 modulates key VSMC-developmental pathways**

540 (A-C) Common transcriptional response of VSMCs to Svep1 and Svep1<sup>CADrv</sup> proteins. Dysregulated (A)  
541 KEGG pathways, (B) GO term molecular functions, and (C) InterPro domains. Top 5 dysregulated  
542 categories plus additional, select categories are included. Full results are available in Supplemental  
543 Table 1. Bars represent -log<sub>10</sub> of *P* values.  
544 (D) Transcription of canonical Notch target genes after 4 hours of adhesion to Svep1, relative to BSA.  
545 Two-tailed t-test.  
546 (E) Basal transcription of Notch target genes in *Svep1*<sup>SMC<sup>+/+</sup></sup> and *Svep1*<sup>SMC<sup>Δ/Δ</sup></sup> VSMCs. Two-tailed t-test.  
547 (F) Proliferation of VSMCs in response to immobilized Svep1. Cells were treated with DMSO (carrier)  
548 or 25  $\mu$ M DAPT. Proliferation was determined by BrdU incorporation. Two-tailed t-test.  
549 (G-H) Differential transcriptional response of VSMCs to Svep1 and Svep1<sup>CADrv</sup> proteins. Dysregulated  
550 (A) KEGG pathways, (B) GO term molecular functions. Top 5 dysregulated categories plus additional,  
551 select categories are included. Full results are available in Supplemental Table 1. Bars represent -log<sub>10</sub> of  
552 *P* values.

553 (I) Bar graph of *Fgfr* transcript counts from RNAseq. Each transcript is normalized to the BSA control  
554 group. Two-tailed t-test.  
555 (J, K) qPCR of (J) VSMC markers, and (K) inflammatory markers of VSMC cultured with or without 50  
556  $\mu\text{g ml}^{-1}$  oxLDL for 24 hr. \* $P < 0.05$ ; \*\* $P < 0.01$ ; \*\*\* $P < 0.001$ .

557

### 558 **Figure 7. Svep1 promotes inflammation in atherosclerosis**

559 (A-B) Differential transcriptional profile of atherosclerotic aortic arches from *Svep1*<sup>SMC+/+</sup> and  
560 *Svep1*<sup>SMC $\Delta/\Delta$</sup>  mice. Dysregulated (A) KEGG pathways (B) GO term molecular functions. Top 5  
561 dysregulated categories plus additional, select categories are included. Full results are available in  
562 Supplemental Table 2. Bars represent  $-\log_{10}$  of  $P$  values.

563 (C) Histogram for *Itga9 $\beta$ 1* expression in mouse blood neutrophils (CD11b<sup>+</sup>Ly6G<sup>+</sup>), Ly6C<sup>low</sup>  
564 (CD11b<sup>+</sup>Ly6C<sup>low</sup>), and Ly6C<sup>high</sup> (CD11b<sup>+</sup>Ly6C<sup>high</sup>) monocytes from *Svep1*<sup>SMC+/+</sup> and *Svep1*<sup>SMC $\Delta/\Delta$</sup>  mice  
565 after 8 weeks of HFD.

566 (D) Histogram of *Itga9 $\beta$ 1* expression in the subpopulations of aortic leukocytes. Macrophages  
567 (CD64<sup>+</sup>CD11b<sup>+</sup>), DCs (CD11c<sup>+</sup>MHCII<sup>high</sup>), neutrophils (CD11b<sup>+</sup>Ly6G<sup>+</sup>), and Ly6C<sup>high</sup>  
568 (CD11b<sup>+</sup>Ly6C<sup>high</sup>) monocytes from *Apoe*<sup>-/-</sup> and *Svep1*<sup>+/-</sup>*Apoe*<sup>-/-</sup> mice after 8 weeks of HFD.

569 (E) Expression of *Itga9* in the aortic roots from *Svep1*<sup>SMC+/+</sup> and *Svep1*<sup>SMC $\Delta/\Delta$</sup>  mice using ISH after 8  
570 weeks of HFD. Tissues were co-stained for Mac3 and SM $\alpha$ -actin. Scale bars, 50  $\mu\text{m}$ .

571 (F) Expression of *Itga9* in BMDM from *Itga9*<sup>MAC+/+</sup> and *Itga9*<sup>MAC $\Delta/\Delta$</sup>  mice.

572 (G) Migratory response of thioglycolate-elicited macrophages from *Itga9*<sup>MAC+/+</sup> and *Itga9*<sup>MAC $\Delta/\Delta$</sup>  were  
573 determined using a chemotaxis chamber incubated with 0, 50, and 200 ng ml<sup>-1</sup> of Svep1 protein.  
574 Migrated cells were counted by an automated microscope and expressed as cells per field of view.

575 (H) *In vivo* monocyte recruitment assay. YG-bead uptake within plaque lesion in the aortic root regions  
576 from *Svep1*<sup>SMC+/+</sup> and *Svep1*<sup>SMC $\Delta/\Delta$</sup>  mice. Quantification of YG-bead uptake showing the total number of  
577 YG-beads per section (left Y axis), and the number of YG-beads normalized to the percentage of labeled  
578 Ly6C<sup>low</sup> monocytes (right Y axis).  $n = 6-7/\text{group}$ . Scale bar, 50  $\mu\text{m}$ . \* $P < 0.05$ ; \*\* $P < 0.01$ .

579

580 **Figure 1. *SVEP1* is expressed by VSMCs under pathological conditions.**

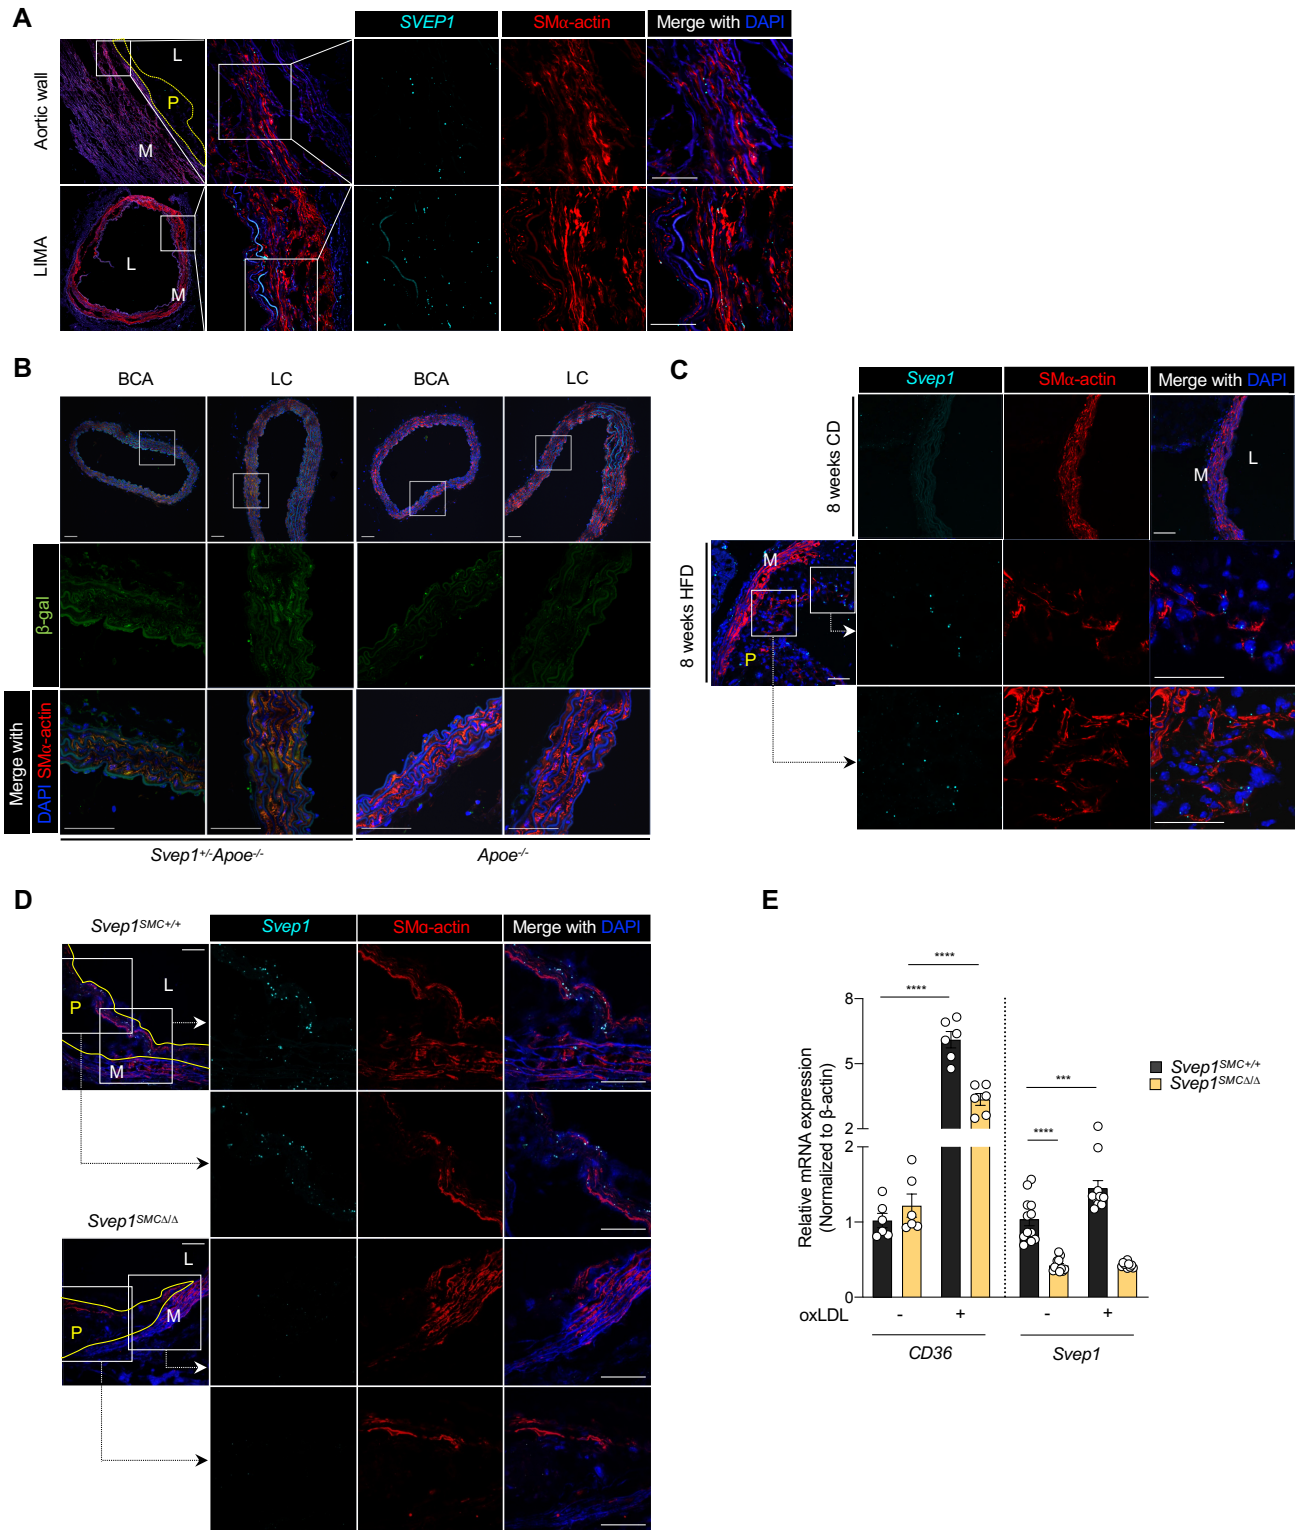

581

582 **Figure 2. *Svep1* haploinsufficiency abrogates atherosclerosis**

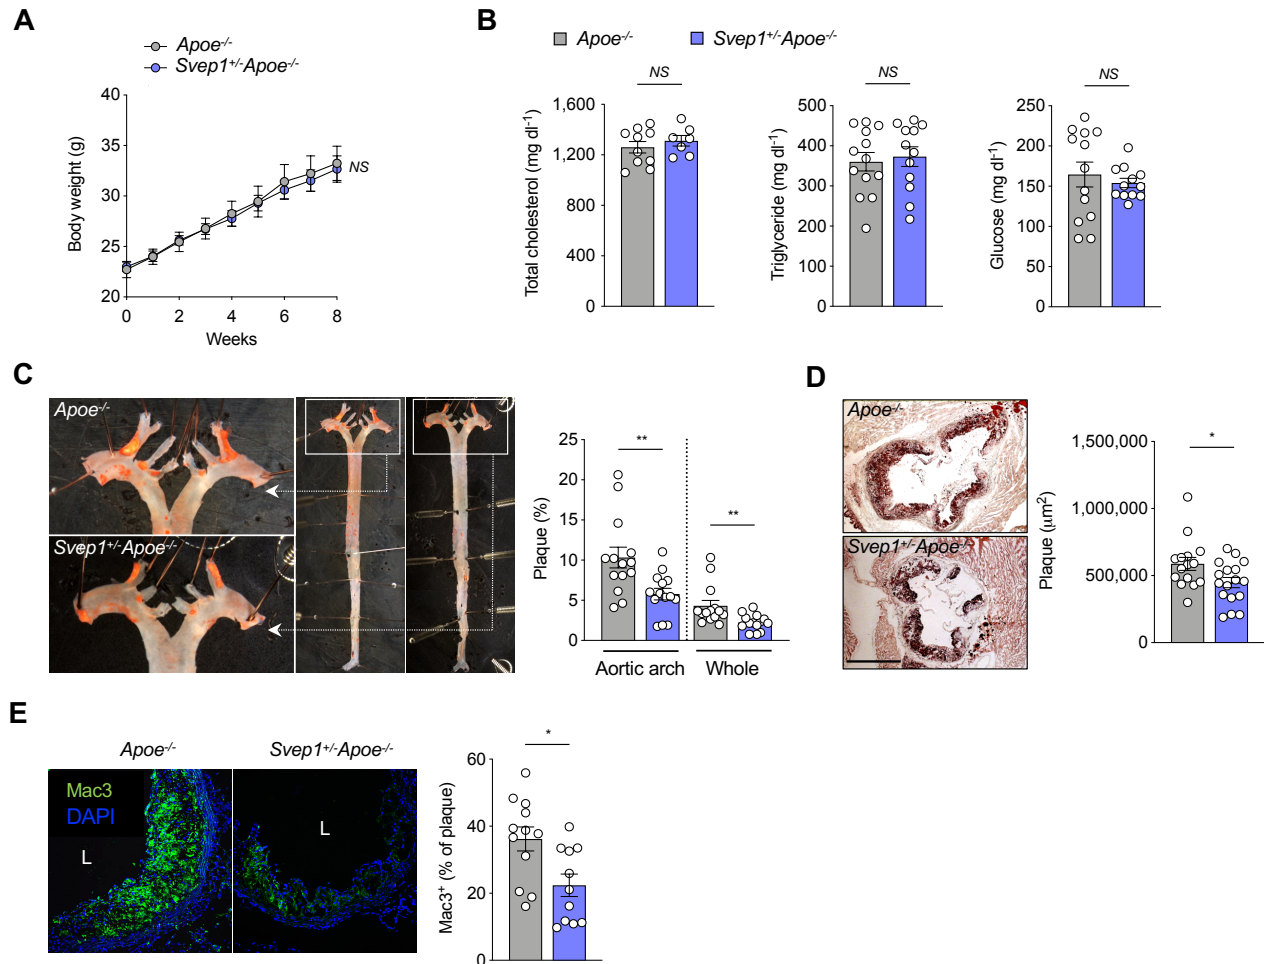

583

584 **Figure 3. VSMC-specific *Svep1* deficiency reduces atherogenesis and plaque complexity.**

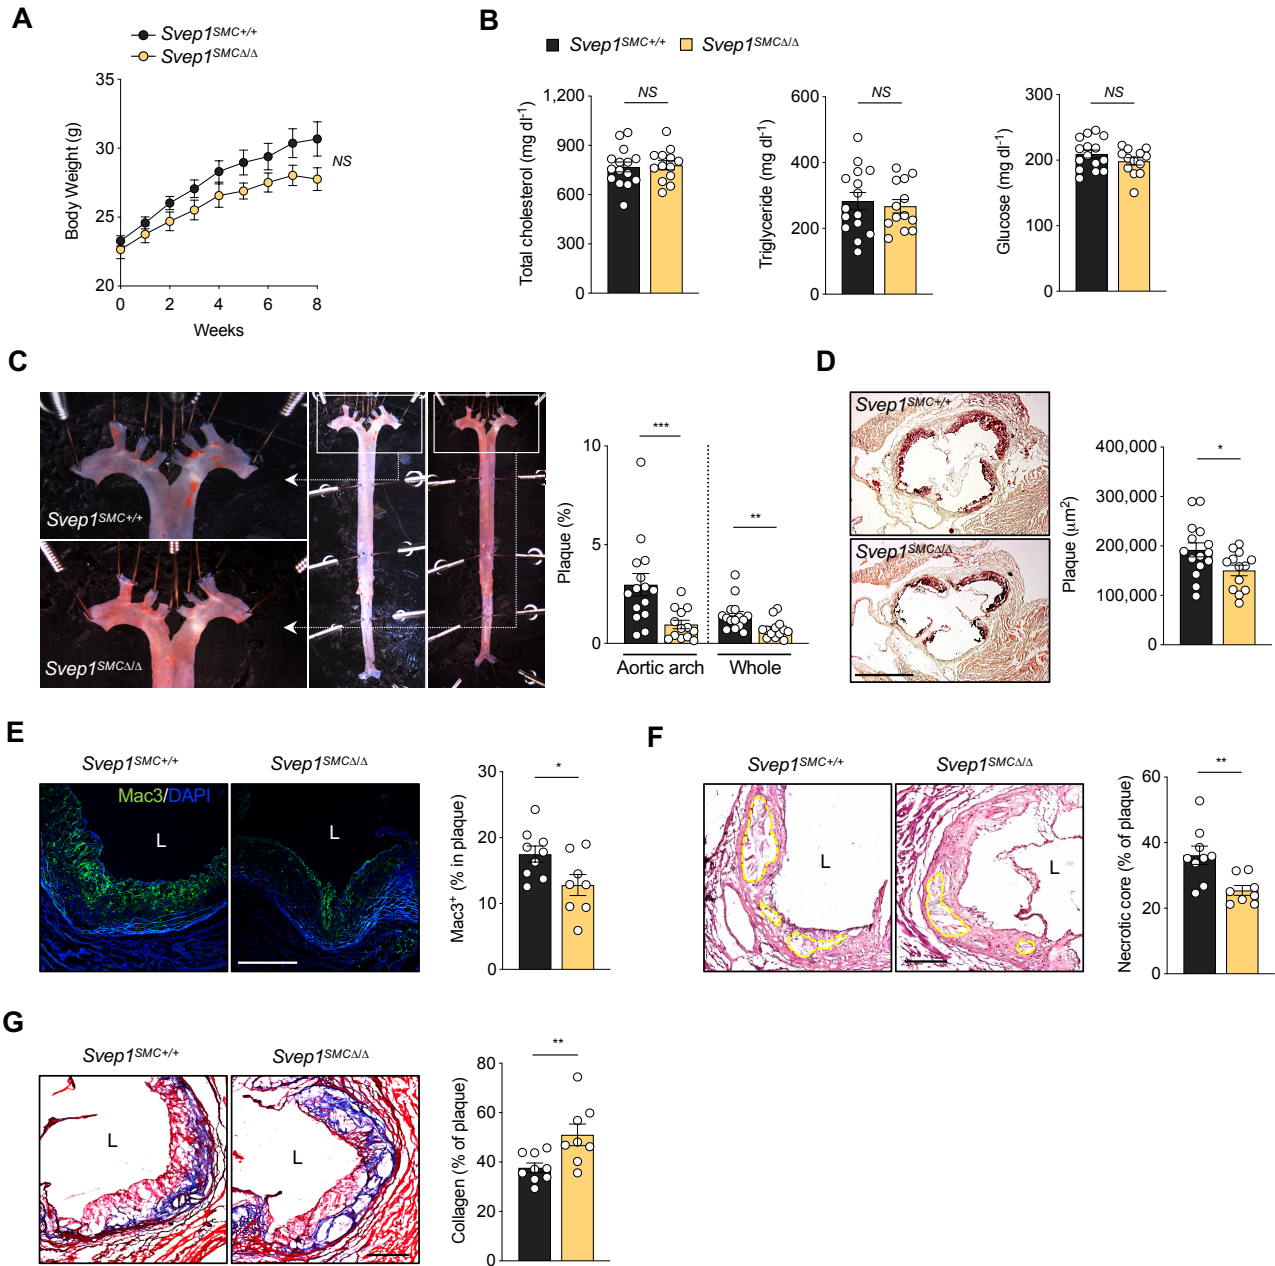

585

586 **Figure 4. Plasma levels of SVEP1 are causally related to CAD in humans.**

**A**

| rsID       | Reference allele | Alternate allele | Protein impact | Effect | P value             |
|------------|------------------|------------------|----------------|--------|---------------------|
| rs11124523 | C                | T                | SVEP1 D2702G   | 0.48   | $8 \times 10^{-14}$ |

**B**

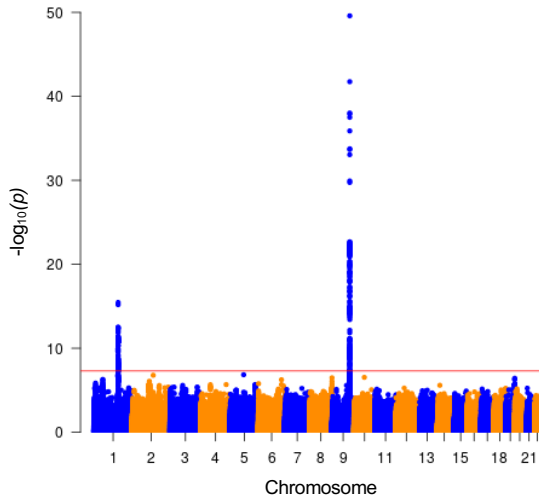

**C**

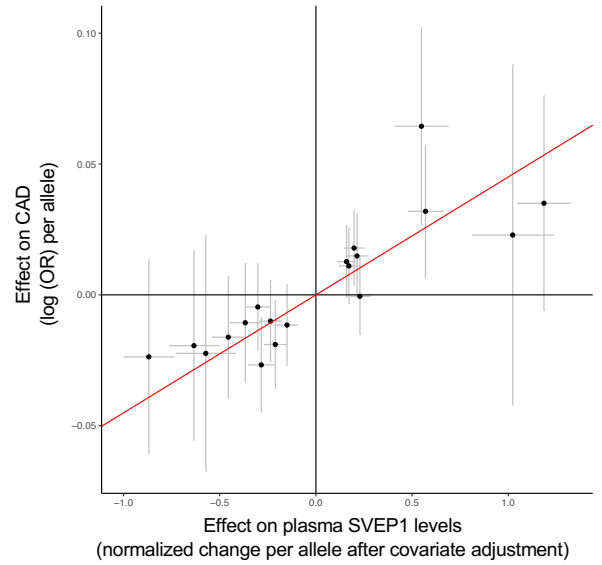

**D**

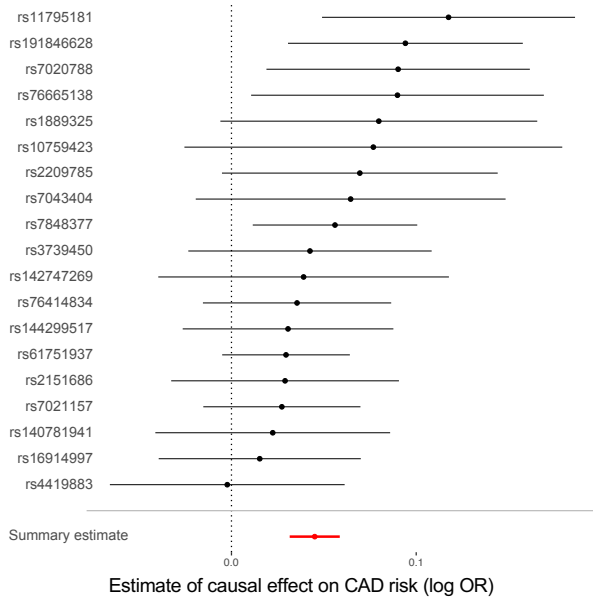

587

588 **Figure 5. Svep1 induces Itga9-dependent proliferation in VSMCs.**

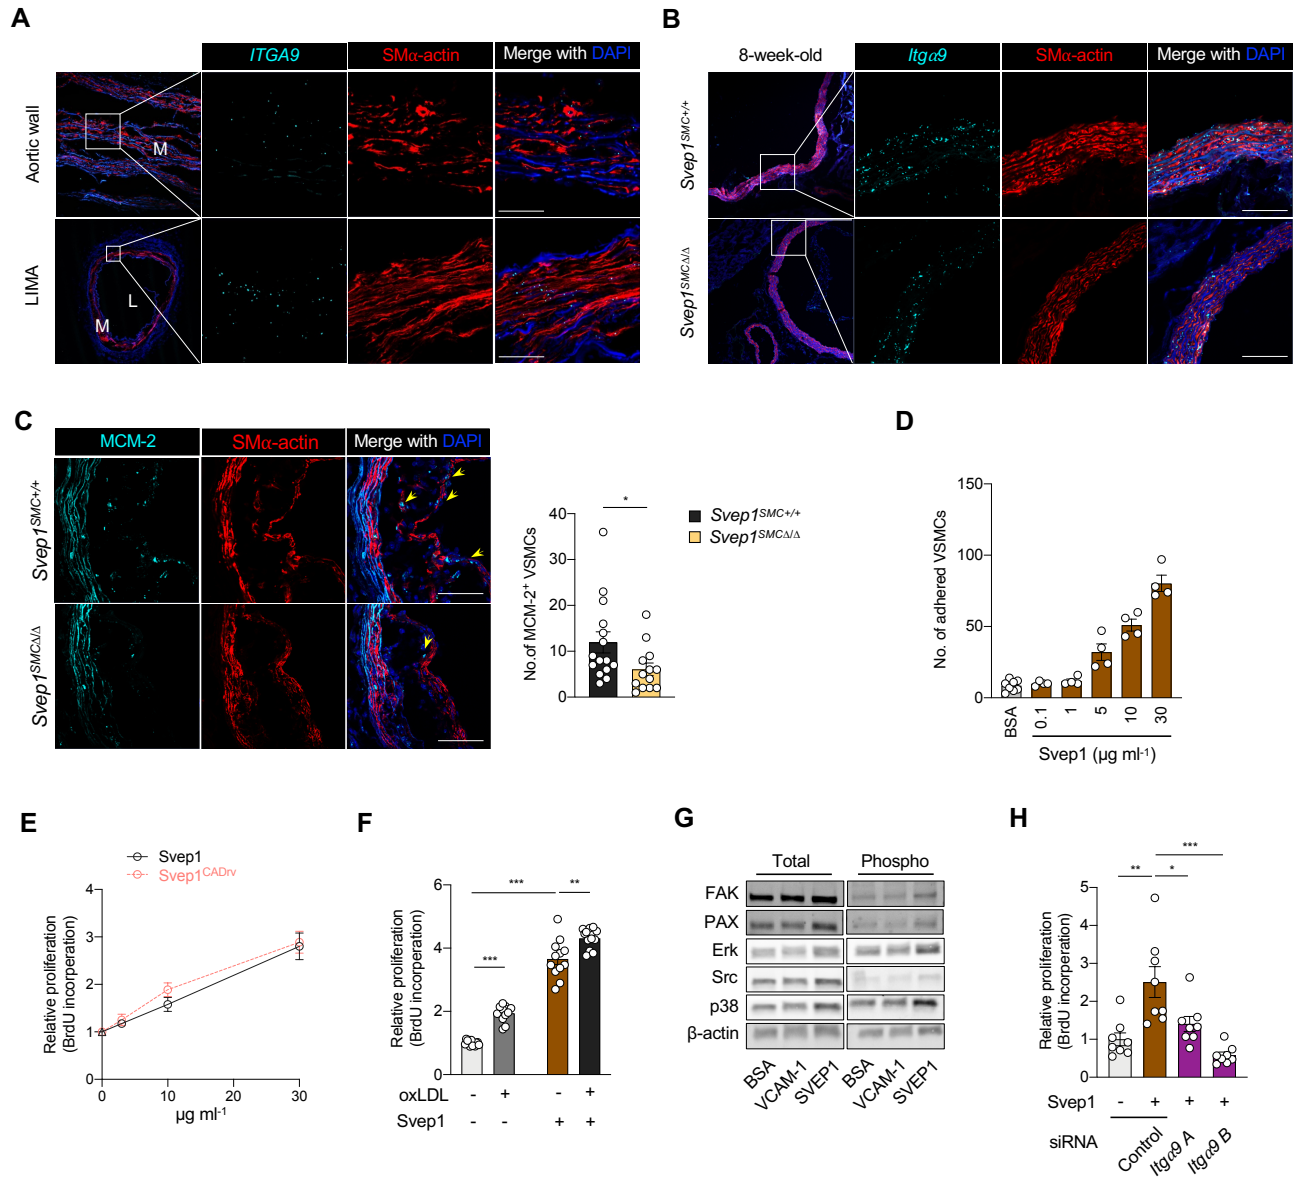

589



590 **Figure 6. Svep1 modulates key VSMC-developmental pathways**

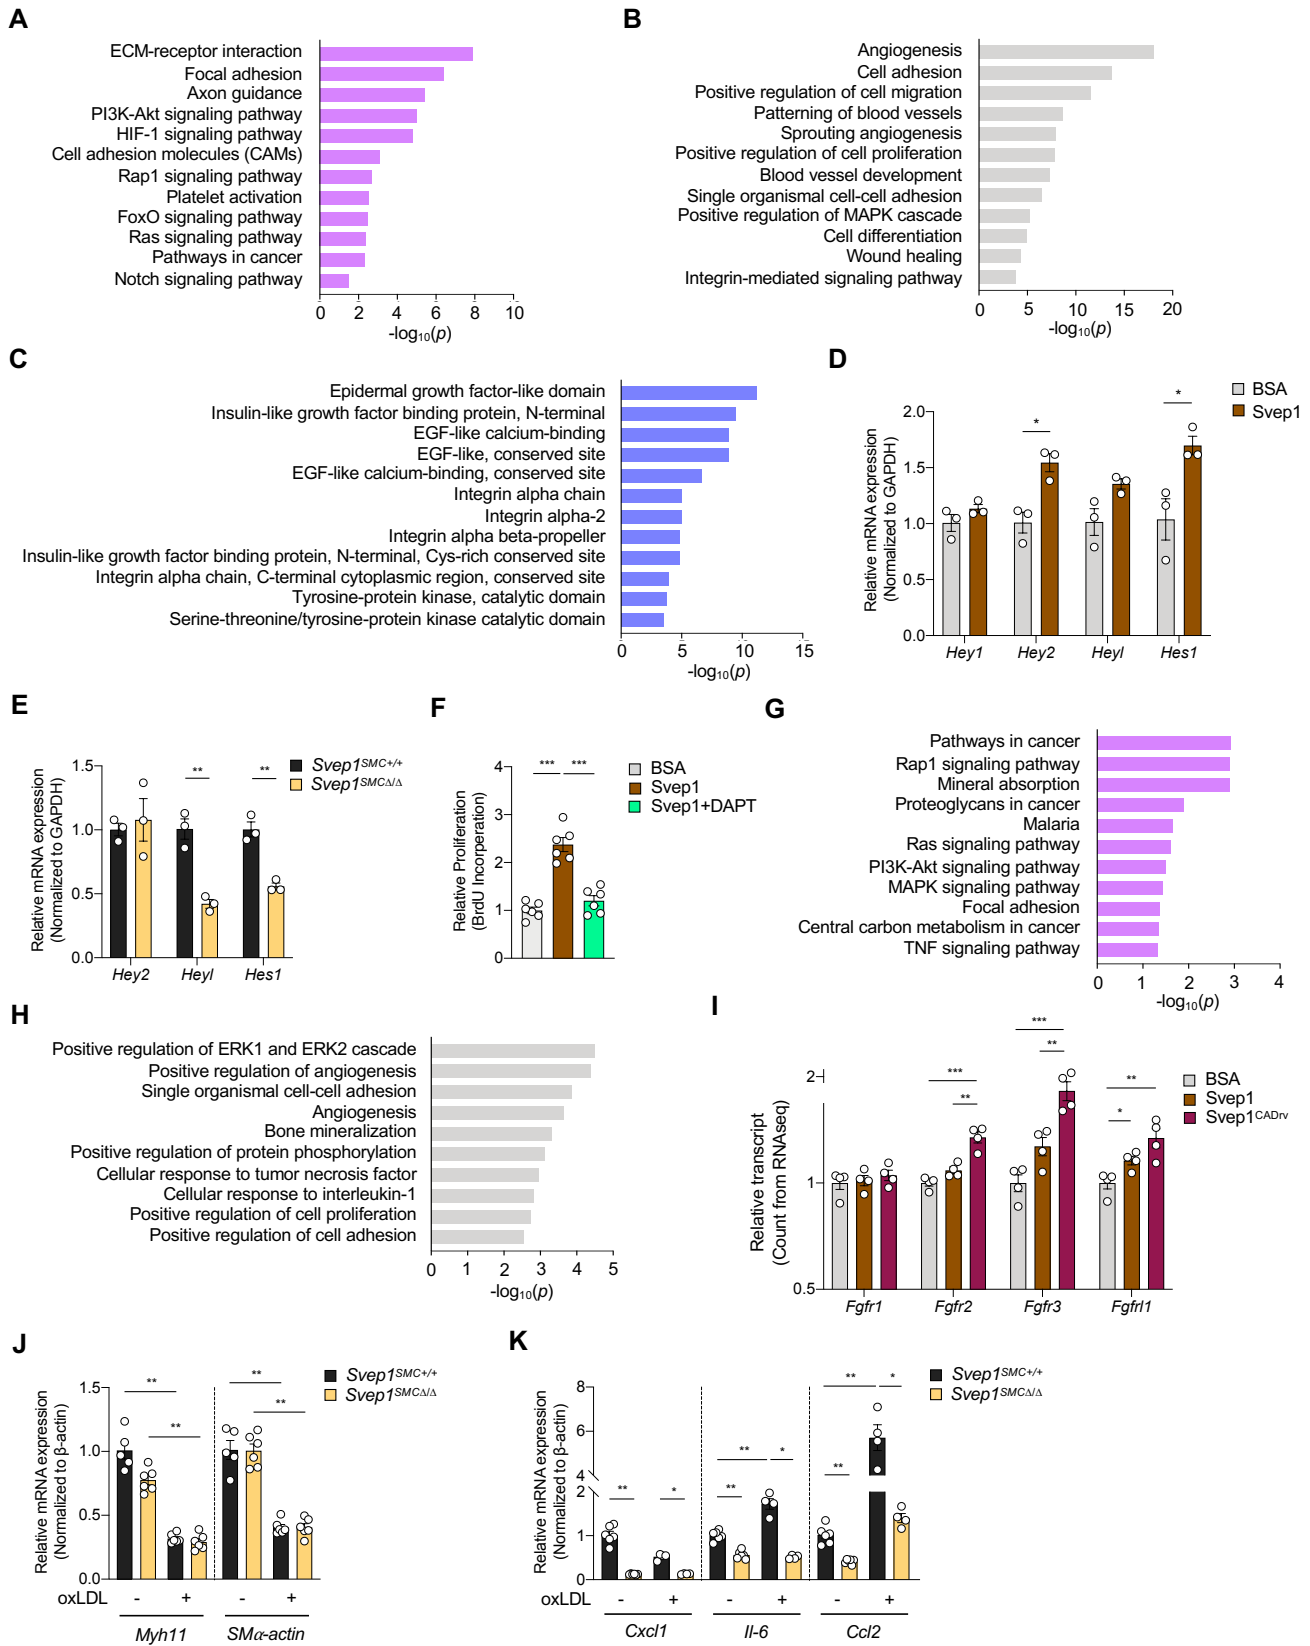

592 **Figure 7. Svep1 promotes inflammation in atherosclerosis**

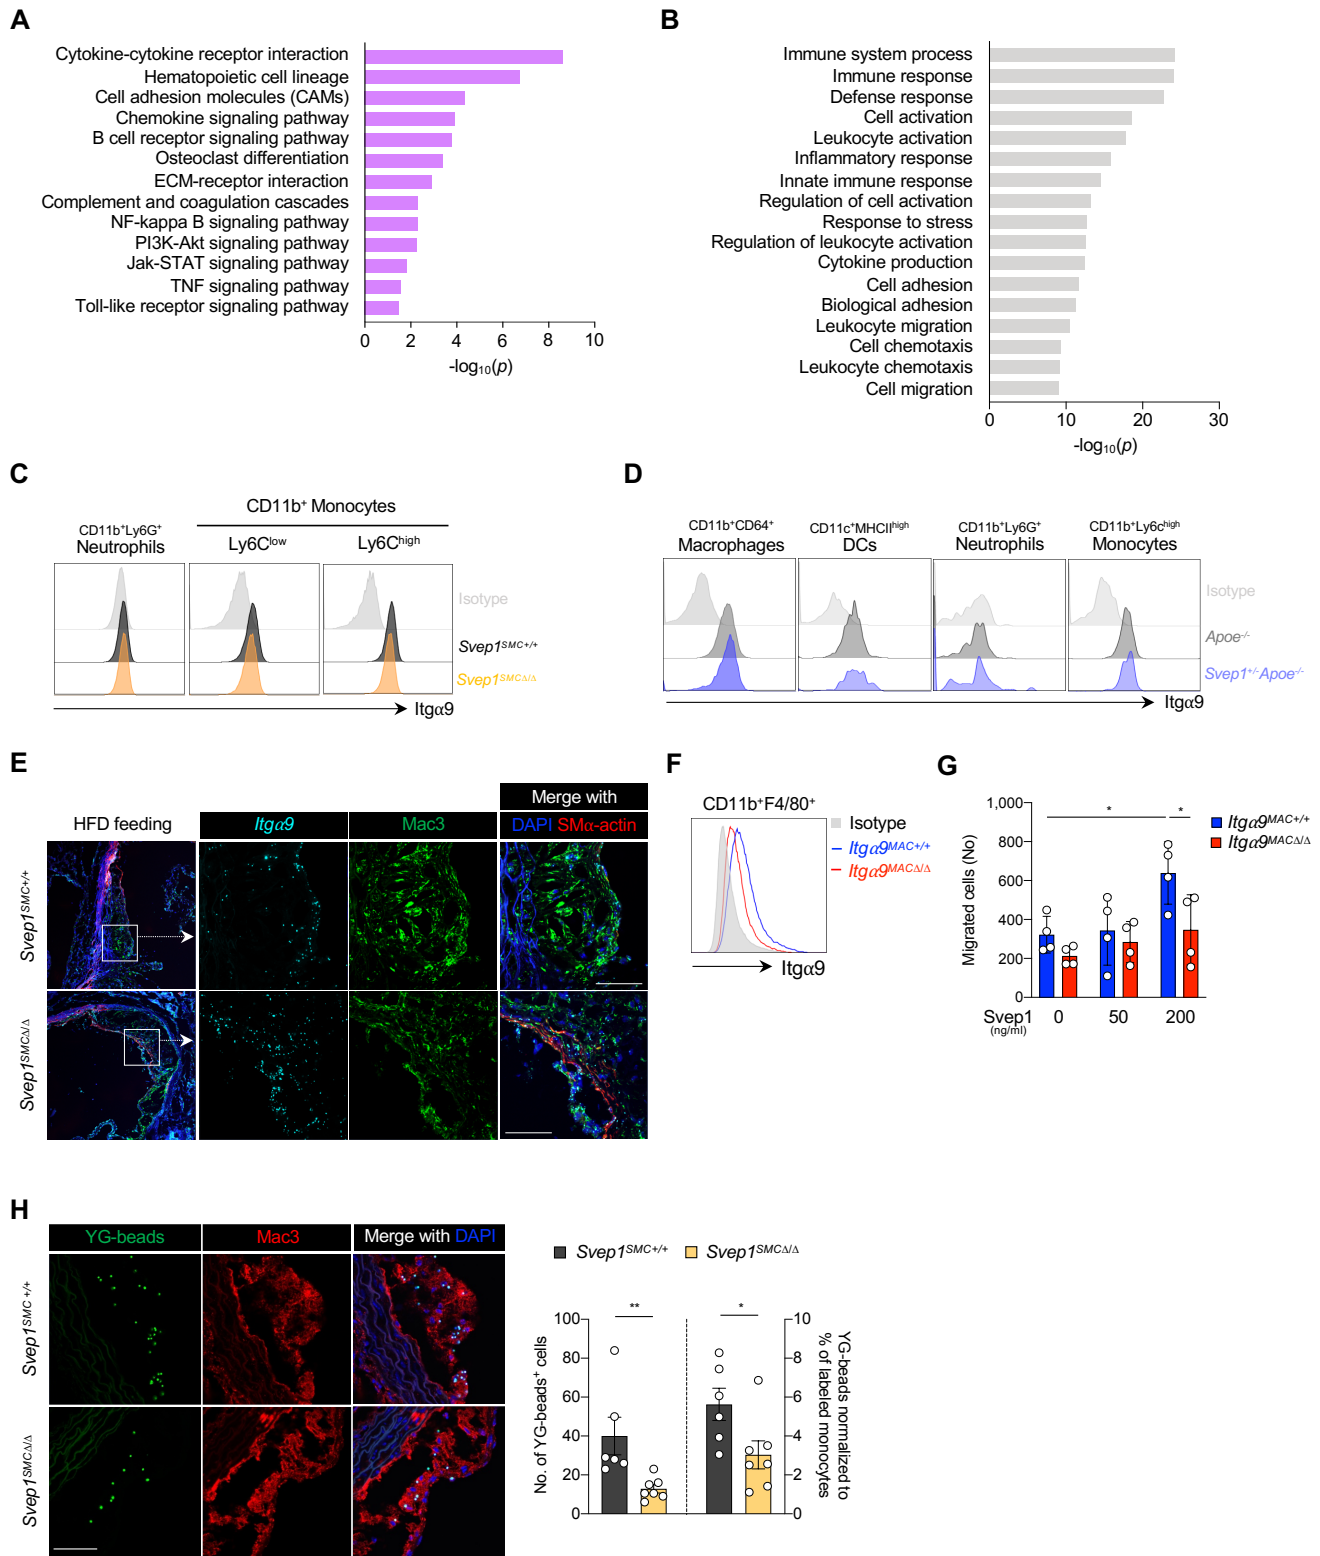

594 **Acknowledgements**

595 This work was supported in part by grants from the National Institutes of Health (NIH) T32GM007200  
596 and T32HL134635 to JSE and NIH T32HL007081 to EPY, along with NIH grants R01HL131961,  
597 UM1HG008853, UL1TR002345, an investigator-initiated research grant from Regeneron  
598 Pharmaceuticals, a career award from the National Lipid Association, and by the Foundation for Barnes-  
599 Jewish Hospital to NOS. We thank the Genome Technology Access Center in the Department of  
600 Genetics at Washington University School of Medicine for help with genomic analysis. The Center is  
601 partially supported by NCI Cancer Center Support Grant #P30 CA91842 to the Siteman Cancer Center  
602 and by ICTS/CTSA Grant# UL1TR002345 from the National Center for Research Resources (NCRR), a  
603 component of the National Institutes of Health, and NIH Roadmap for Medical Research. We thank the  
604 Bursky Center for Human Immunology and Immunotherapy Programs at Washington University,  
605 Immunomonitoring Laboratory for help with analysis of mouse plasma. This publication is solely  
606 the responsibility of the authors and does not necessarily represent the official view of NCRR or NIH.  
607 The Svep1 mouse strain used for this research was created from ES cell clone HEPD0747\_6\_B06,  
608 generated by the European Conditional Mouse Mutagenesis Program which was then made into mice  
609 and provided to the KOMP Repository ([www.komp.org](http://www.komp.org)) by the Jackson Laboratory as part of the  
610 KOMP2 Project. The Genotype-Tissue Expression (GTEx) Project was supported by the Common  
611 Fund of the Office of the Director of the National Institutes of Health, and by NCI, NHGRI, NHLBI,  
612 NIDA, NIMH, and NINDS. Data used for the analyses described in this manuscript were obtained from  
613 the GTEx Portal on 04/30/2020. We thank all the members of the Stitzel Lab for helpful discussion.

614

615 **Author information**

616 NOS conceived of the study. IHJ performed animal experiments. JSE and IHJ performed *in vitro*  
617 experiments. IHJ, JSE, AA, and NOS designed and interpreted the experiments. AA and KS generated  
618 critical reagents. EPY and CJK performed Mendelian Randomization analyses. PK provided and  
619 assisted with human specimens. KJL, BR, and RPM provided expertise in animal models and data  
620 interpretation. IHJ, JSE, and NOS wrote the manuscript. All authors reviewed and provided critical  
621 editing of the manuscript.

622

623 **Conflicts of interest**

624 NOS has received investigator-initiated research funds from Regeneron Pharmaceuticals. The other  
625 authors have no conflicts.

626 **Methods**

627 **Human tissue collection**

628 Prior to coronary artery bypass grafting surgery (CABG) for the treatment of symptomatic coronary  
629 artery disease, we consented five patients for tissue and peripheral blood collection at the time of their  
630 planned CABG to be performed at Barnes Jewish Hospital. The surgical plan for all patients included  
631 using the left internal mammary artery (LIMA) as an arterial graft to the left anterior descending (LAD)  
632 coronary artery and at least one venous graft to a different coronary artery. During the CABG, we  
633 collected the distal end of the LIMA which was trimmed in order to accommodate the length needed to  
634 reach the LAD. We also collected the aortic wall punch biopsy that was used to provide a proximal  
635 anastomotic site for the venous conduit. Tissues were immediately placed in phosphate buffered saline  
636 (PBS) on ice and brought to the laboratory where they were frozen at -80°C prior to in situ hybridization  
637 described below. During the CABG, we also collected 5-7 ml of peripheral blood in a tube containing  
638 the anticoagulant K<sub>3</sub> EDTA (#6457, BD Biosciences) which was used for flow cytometry as described  
639 below. All research participants provided written informed consent and the study was approved by the  
640 Washington University School of Medicine Human Research Protection Office and Institutional Review  
641 Board.

643 **Mice**

644 All animal studies were approved by the Animal Studies Committee and the Institutional Animal Care  
645 and Use Committee of the Washington University School of Medicine. *Svep1*<sup>+/-</sup> mice were made by  
646 KOMP (knockout mouse project), and these mice were then crossed with mice expressing the flippase  
647 FLP recombinase under the control of the promoter of the human actin beta gene (hATCB) to generate  
648 *Svep1*<sup>fllox/fllox</sup> (*Svep1*<sup>Δ/Δ</sup>) mice. CRISPR/Cas9 genome editing technology was used in collaboration with  
649 the Washington University School of Medicine Genome Engineering and Transgenic Micro-Injection  
650 Cores to generate *Svep1*<sup>G/G</sup> mice on a C57BL/6 background harboring the *SVEP1* mutation at the  
651 homologous murine position (p.D2699G). *Svep1*<sup>+/-</sup> and *Svep1*<sup>G/G</sup> mice were crossed with *ApoE*<sup>-/-</sup> mice  
652 (#002052, Jackson Laboratory) to get *Svep1*<sup>+/-</sup>*ApoE*<sup>-/-</sup> and *Svep1*<sup>G/+</sup>*ApoE*<sup>-/-</sup> mice, which we maintained as  
653 breeders to generate experimental and control mice. We crossed *Svep1*<sup>Δ/Δ</sup> mice with *Myh11-CreER*<sup>T2</sup>  
654 (#019079, Jackson Laboratory) mice to generate *Svep1*<sup>Δ/+</sup>*Myh11-CreER*<sup>T2</sup> mice. *Svep1*<sup>Δ/+</sup>*Myh11-*  
655 *CreER*<sup>T2</sup> males were then crossed with *Svep1*<sup>Δ/+</sup> females to generate experimental *Svep1*<sup>Δ/Δ</sup>*Myh11-*  
656 *CreER*<sup>T2</sup> and control *Svep1*<sup>+/+</sup>*Myh11-CreER*<sup>T2</sup> male littermate mice. Finally, *Svep1*<sup>Δ/Δ</sup>*Myh11-CreER*<sup>T2</sup>  
657 males were crossed with *ApoE*<sup>-/-</sup> females. We maintained *Svep1*<sup>Δ/+</sup>*Myh11-CreER*<sup>T2</sup>*ApoE*<sup>-/-</sup> males and

658 *Svep1<sup>Δ/+</sup>Apoe<sup>-/-</sup>* females as breeders to generate experimental *Svep1<sup>Δ/Δ</sup>Myh11-CreER<sup>T2</sup>Apoe<sup>-/-</sup>*  
659 (*Svep1<sup>SMCΔ/Δ</sup>*) and control *Myh11-CreER<sup>T2</sup>Apoe<sup>-/-</sup>* (*Svep1<sup>SMC+/+</sup>*) mice. To activate Cre-recombinase, mice  
660 were injected intraperitoneally with 1 mg of tamoxifen (#T5648, Sigma-Aldrich) in 100 ml peanut oil  
661 (#P2144, Sigma-Aldrich) for 10 consecutive days starting at 6 weeks of age. Tamoxifen treatment was  
662 performed with all experimental and control mice in an identical manner. *Itga9<sup>flx/flx</sup>* (*Itga9<sup>Δ/Δ</sup>*) mice  
663 were gifts from Dr. Dean Sheppard and Livingston Van De Water (Albany Medical College, New  
664 York), and *LysM-Cre* mice were provided from Dr. Babak Razani (Washington University School of  
665 Medicine, Saint Louis). We crossed *Itga9<sup>fl/fl</sup>* mice with *LysM-Cre* mice to generate *Itga9<sup>fl/fl</sup>LysM-Cre*  
666 (*Itga9<sup>MACΔ/Δ</sup>*) and control *Itga9<sup>+/+</sup>LysM-Cre* (*Itga9<sup>MAC+/+</sup>*) mice. All mice were housed in separate cages  
667 in a pathogen-free environment at Washington University School of Medicine animal facility and  
668 maintained on a 12 hr light/12 hr dark cycle with a room temperature of 22 ± 1°C.

669

#### 670 **Diet and assessment of atherosclerosis**

671 All experimental mice were fed a diet containing 21% fat and 0.2% cholesterol (#TD.88137, Envigo  
672 Teklad) for 8 and 16 weeks starting at 8 weeks of age. After HFD feeding, blood was collected from the  
673 retro-orbital plexus after 12 hr of fasting. Mice were euthanized by carbon dioxide inhalation. Plasma  
674 samples were prepared from the collected blood by centrifugation at 13,000 rpm for 10 min at 4°C.  
675 Total cholesterol (#STA-384), triglycerides (#STA-397), and glucose (#STA-681) in mouse plasma  
676 were determined using the appropriate kit (all purchased from Cell Biolabs, Inc). Hearts and whole  
677 aortas (from the aortic arch to the iliac artery) were harvested after perfusion with PBS. For *en face*  
678 analysis, isolated aortas were cleaned by removing perivascular fat tissues, opened longitudinally, and  
679 pinned onto black wax plates. After fixation with 4% paraformaldehyde overnight at 4°C, aortas were  
680 washed with PBS for 1 hr, and stained with 0.5% Oil Red O in propylene glycol (#O1516, Sigma-  
681 Aldrich) for 3 hr at room temperature. After staining, aortas were de-stained with 85% propylene glycol  
682 in distilled water for 5 min to reduce background staining and washed with distilled water for 15 min.  
683 For analysis of plaque in aortic root, hearts were fixed overnight with 4% paraformaldehyde at 4°C,  
684 washed with PBS for 1 hr, and embedded into OCT compound (#4583, Sakura® Finetek). 5-μm-thick  
685 cryosections were stained overnight with 0.5% Oil Red O in propylene glycol, de-stained with 85%  
686 propylene glycol in distilled water for 5 min, and washed with distilled water for 15 min. Measurement  
687 of plaque was performed using 6-8 sections per artery to get the average value of size. The  
688 atherosclerotic plaque area was digitized and calculated using AxioVison (Carl Zeiss).

689



722 For immunofluorescent staining, anti- $\beta$ -galactosidase (#ab9361, abcam, 1:1000), anti-Mac3  
723 (#550292, clone M3/84, BD Biosciences, 1:100), anti-SM $\alpha$ -actin-cy3 (#C6198, clone 1A4, Sigma-  
724 Aldrich, 1:1000), anti-MCM-2 (#4007, Cell Signaling, 1:100) were used, and then visualized with anti-  
725 chicken-Alexa488 (#A11039), anti-rat-Alexa488 (#A21470), anti-rat- Alexa594 (#A21471, all  
726 purchased from Invitrogen, 1:400), and ProLong<sup>TM</sup> Gold antifade reagent with DAPI (#P36935,  
727 Invitrogen) were used. In case of detection of MCM-2 staining, samples were visualized with anti-  
728 rabbit-HRP (#7074S, Cell Signaling, 1:1000) followed by TSA<sup>®</sup> Plus Cyanine 5 (#NEL745E001KT,  
729 PerkinElmer). For immunohistochemistry study, hematoxylin solution (#HHS80), eosin solution  
730 (#HT110180), Masson's trichrome staining kit (#HT15-1KT, all purchased from Sigma-Aldrich), and  
731 Permount solution (#SP15-500, Fisher Chemicals) were used. For flow cytometry, following anti-mouse  
732 antibodies were used; anti-CD16/32 FcR blocker (#14-0161, eBioscience), PerCP-labeled anti-CD45  
733 (#103129, clone 30-F11), BV510-labeled anti-CD11b (#101263, clone M1/70), BV421-labeled anti-  
734 CD64 (#139309, clone X54-5/7.1), PE/cy7-labeled anti-CD11c (#117317, clone N418), APC/cy7-  
735 labeled anti-MHCII (#107627, clone M5/114.15.2), FITC-labeled anti-F4/80 (#123108, clone BM8),  
736 BV605-labeled anti-CD19 (#115540, clone 6D5), APC-labeled anti-CD115 (#135510, clone AFS98),  
737 Alexa700-labeled anti-Ly6C (#128023, clone HK1.4), PE/Cy7-labeled anti-Ly6G (#127618, clone 1A8,  
738 all purchased from Biolegend), PE/cy5.5-labeled anti-CD4 (#35-0042-82, clone RM4-5, eBioscience),  
739 Alexa700-labeled anti-CD8a (#56-0081-80, clone 53-6.7, eBioscience), and PE-labeled anti-Itg $\alpha$ 9 $\beta$ 1  
740 (#FAB3827P, R&D systems). Following anti-human antibodies were used. FcR blocker (#564219, BD  
741 biosciences), PerCP/cy5.5-labeled anti-CD45 (#368504, clone 2D1), Alexa700-labeled anti-CD3  
742 (#300323, clone HIT3a), anti-CD19 (#115527, clone 6D5), anti-CD56 (#392417, clone QA17A16),  
743 FITC-labeled anti-CD15 (#301904, clone HI98), BV421-labeled CD66b (#305111, clone G10F5),  
744 APC/cy7-labeled anti-CD14 (#325619, clone HCD14), BV605-labeled anti-CD16 (#360727, clone  
745 B73.1), and PE-labeled anti-ITG $\alpha$ 9 $\beta$ 1 (#351606, clone Y9A2, all purchased from Biolegend). RBC lysis  
746 buffer (#423101, Biolegend), FoxP3 transcription factor staining buffer set (#00-5523, eBioscience),  
747 Leuko spin medium (#60-00091, Pluriselect) were used in flow cytometry experiments. Antibodies for  
748 western blotting include: Src (#2109), P-Src (#6943) FAK (#3285), P-FAK (#8556), Paxillin (#2542), P-  
749 Paxillin (#2541), Erk (#4695), P-Erk (#4370), p38 (#8690), P-p38 (#9211, all purchased from Cell  
750 signaling Technologies).  
751

752 **Immunohistochemistry and immunofluorescent staining**

753 For all immunohistochemistry and immunofluorescent study, we used 4% paraformaldehyde-fixed  
754 frozen sections with 5- $\mu$ m-thickness. For immunofluorescent staining, slides were air-dried for 1 hr at  
755 room temperature and hydrated with PBS for 10 min. After permeabilization with 0.5% tritonX-100 for  
756 10 min, sections were blocked with PBS containing 5% chicken serum (#S-3000, Vector Laboratories)  
757 with 0.5% tritonX-100 for 1 hr at room temperature. And then slides were incubated with the indicated  
758 antibodies. For hematoxylin and eosin (H&E) staining, air-dried slides were hydrated in PBS for 10 min,  
759 placed in hematoxylin solution for 10 min, and then rinsed in running tap water. After de-staining in 1%  
760 acetic acid for 5 min, slides were rinsed in tap water, and placed in 90% ethanol for 5 min. Slides were  
761 stained with eosin solution for 8 min, gradually dehydrated in ethanol solution (from 80% to 100%), and  
762 then incubated with xylene for 10 min followed by mounting with Permount solution. For Masson's  
763 trichrome staining, air-dried slides were hydrated in distilled water for 10 min, placed in Mordant in  
764 Bousin's solution for 1 hr at 56°C, and rinsed in running tap water for 5 min. After staining in  
765 hematoxylin solution for 10 min, slides were washed in running tap water for 10 min, rinsed in distilled  
766 water, placed in Biebrich scarlet-acid fuchsin solution for 15 min, and stained in aniline blue solution for  
767 10 min. After rinsing in distilled water, slides were differentiated in 1% acetic acid for 3 min, gradually  
768 dehydrated in ethanol solution (from 80% to 100%), incubated with xylene for 10 min followed by  
769 mounting with Permount solution.

770

771 **RNAscope *in situ* hybridization (ISH)**

772 For detection of *Svepl1*, *Itga9* RNA transcripts in both human and mouse artery tissues, a commercially  
773 available kit (#323100, RNAscope® Multiplex Fluorescent Reagent Kit v2, Advanced Cell Diagnostics)  
774 was used according to the manufacturer's instructions. Briefly, 4% paraformaldehyde-fixed mouse  
775 aortic root and human aortic wall, and LIMA frozen sections with 5- $\mu$ m-thickness were air-dried for 1 hr  
776 at room temperature, and treated with hydrogen peroxide for 10 min to block endogenous peroxidase  
777 activity. After antigen retrieval by boiling in target antigen retrieval solution for 5 min at 95-100°C,  
778 slides were treated with protease III for 30 min at 40°C. Target probes (#406441, mouse *Svepl1*;  
779 #540721, mouse *Itga9*; #811671, human *SVEP1*; #811681, human *ITGA9*) were hybridized for 2 hr at  
780 40°C, followed by a series of signal amplification and washing steps. Hybridization signals were  
781 detected by TSA® Plus Cyanine 5, and co-stained with indicated antibodies. Slides were counterstained  
782 with DAPI by using ProLong™ Gold antifade reagent.

783



784 **Flow cytometry**

785 For labeling mouse blood cells, blood was collected from the retro-orbital plexus, and red blood cells  
786 were removed using RBC lysis buffer (#00-4300-54, eBioscience). For labeling human blood cells,  
787 Leuko spin medium (Pluriselect) was used to isolate leukocytes from peripheral blood and buffy coat. In  
788 an experiment using mouse spleen, spleen cells were recovered from mice by cutting the spleen into  
789 small fragments, and incubated with 400 U collagenase D (#11-088-858, Roche applied science) for 30  
790 min at 37°C. For labeling aortic single cell suspensions, isolated aortas were perfused with DPBS, and  
791 opened longitudinally. The whole artery was cut into 2–5 mm pieces, and incubated in a Hanks'  
792 Balanced Salt Solution (HBSS) solution with calcium and magnesium containing 90 U ml<sup>-1</sup> DNase I  
793 (#DN25), 675 U ml<sup>-1</sup> collagenase I (#C0130), 187.5 U ml<sup>-1</sup> collagenase XI (#C7657), and 90 U ml<sup>-1</sup>  
794 hyaluronidase (#H1115000, all purchased from Sigma-Aldrich) for 70 min at 37 °C with gentle shaking.  
795 Non-specific binding to Fc receptors was blocked, and cells were incubated with the indicated  
796 antibodies for 30 min at 4°C. For intracellular staining, cells were fixed/permeabilized with the FoxP3  
797 transcription factor staining buffer set. Flow cytometric analyses were performed using LSRFortessa™  
798 instrument (BD Biosciences) and FlowJo software (Tree Star Inc).

799

800 **Bead labeling of Ly6C<sup>low</sup> monocytes recruited into atherosclerotic plaque**

801 After 8 weeks of HFD feeding, 200 µL of 1 µm Fluoresbrite yellow-green (YG) microspheres beads  
802 (#17154-10, Polysciences, Inc) diluted 1:4 in sterile DPBS were administered retro-orbitally. Labeling  
803 efficiency of blood monocytes was verified by flow cytometry 3 days after YG bead injection.  
804 Recruitment of YG-beads positive monocytes into plaque in aortic root was analyzed 1 day after  
805 checking labeling efficiency of YG beads. 5-µm-thick frozen sections of aortic root were stained with  
806 anti-Mac3, followed by anti-rat-Alexa594 antibody. And slides were mounted with ProLong™ Gold  
807 Antifade Mountant with DAPI. The number of YG-beads colocalized with Mac3 positive area was  
808 counted, or normalized with the percentages of labeled Ly6C<sup>low</sup> monocytes.

809

810 **Aortic VSMC culture**

811 Mouse aortic VSMCs were isolated from 8-week-old *Apoe*<sup>-/-</sup> and *Svep1*<sup>+/-</sup>*Apoe*<sup>-/-</sup>, or same age of  
812 *Svep1*<sup>SMC+/+</sup> and *Svep1*<sup>SMCΔ/Δ</sup> mice after tamoxifen injection for 10 consecutive days starting at 6 weeks of  
813 age. Briefly, thoracic aortas were harvested (3 mice per group were used), perivascular fat was removed,  
814 and then aortas were digested in 1 mg ml<sup>-1</sup> collagenase II (#LS004174), 0.744 units ml<sup>-1</sup> elastase  
815 (#LS002279), 1 mg ml<sup>-1</sup> soybean trypsin inhibitor (#LS003570, all purchased from Worthington

816 Biochemical Corporation), and 1% penicillin/streptomycin in HBSS for 10 min at 37°C with gentle  
817 shaking. After a pre-digestion with enzyme mixture, the adventitial layer was removed under the  
818 dissection microscope, and the intimal layer was removed by scrapping with forceps. Aortas were cut  
819 into small pieces, and completely digested in enzyme mixture at 37°C for 1 hr with gentle shaking.  
820 VSMCs were grown in 20% fetal bovine serum (FBS, Hyclone) containing Dulbecco modified Eagle  
821 medium/F12 (DMEM/F12) media (Gibco) with 100 U ml<sup>-1</sup> penicillin/streptomycin at 37°C, 5% CO<sub>2</sub>  
822 incubator. After 2 passages, VSMCs were changed to 10% serum. To stimulate VSMCs, 50 µg ml<sup>-1</sup>  
823 human medium oxidized low density lipoprotein (oxLDL, #770202-7, Kalen biomedical) was used.

824

### 825 **Quantitative real time PCR**

826 Gene expression was quantified by quantitative real time PCR. RNA was isolated using RNeasy® Mini  
827 Kit (#74106, Qiagen) according to manufacturer's protocol, and QIAshredder homogenizer (#79656,  
828 Qiagen) to increase yield of quantification of RNA. cDNA was synthesized with High Capacity cDNA  
829 Reverse Transcript Kit (#4368814). Real time PCR was performed using both Taqman® (#4444557) and  
830 SYBR™ Green (#A25742, all purchased from Applied Biosystems) assays. Ct values were normalized  
831 to *β-actin* (for Taqman®) and *gapdh* (for SYBR™ Green), and showed as expression relative to control.  
832 List of probes and primers used are in Supplemental Table 3.

833

### 834 ***In vitro* migration assay using peritoneal macrophage**

835 *Itga9*<sup>MAC<sup>+/+</sup></sup> and *Itga9*<sup>MAC<sup>Δ/Δ</sup></sup> mice were injected intraperitoneally with 1 ml 4% thioglycolate. After 5  
836 days, the peritoneal cells were collected by lavage and placed in RPMI media containing 10% FBS for  
837 60 min at 37°C. Non-adherent cells were removed after washing with PBS for 3 times, and adherent  
838 cells (more than 90% were peritoneal macrophages confirmed by flow cytometry) were placed in Trans-  
839 well inserts with a 5-µm porous membrane in a modified Boyden chamber. RPMI media containing  
840 10% FBS with 50 or 200 ng ml<sup>-1</sup> Svep1 protein was placed in the lower chamber. After allowing cell  
841 migration of 16 hr, inserts were removed from upper sider of the chamber, and nuclei of migrated cells  
842 to the lower side of the membrane were stained with DAPI. The number of migrated cells  
843 was determined by In Cell Analyzer 2000 (GE healthcare).

844

### 845 **Proliferation and adhesion assays**

846 Wells of a 96 well plate were pre-coated with 30 µg ml<sup>-1</sup> recombinant Svep1 protein or bovine serum  
847 albumin (BSA, as an inert protein control). Wells were subsequently blocked with 10 mg ml<sup>-1</sup> BSA and

848 washed twice with DPBS. Plates were ultraviolet (UV) sterilized before adding cells. For proliferation  
849 assays, primary VSMCs were collected and suspended in DMEM/F12 media containing 10% FBS.  
850 2,000 cells were added to each well and incubated for 8 hr to assure complete cell adhesion. Media was  
851 then replaced with DMEM/F12 media containing 0.2% BSA and incubated for 12 hr to reduce basal  
852 proliferation rates. Cells were then incubated in BrdU dissolved in DMEM/F12 media containing 0.2%  
853 BSA for 30 hr. Predesigned Silencer Select siRNA constructs targeting *Itga9* and negative control  
854 siRNA were obtained from ThermoFisher. Primary VSMCs were transfected using RNAiMAX  
855 transfection reagents according to the manufacturer's protocol. Efficient *Itga9* knockdown was  
856 confirmed by qPCR. Cells were trypsinized 24 hr after transfection and used for the proliferation assay.  
857 DAPT or DMSO (carrier) were added to cells throughout the indicated experiment at a concentration of  
858 25  $\mu$ M. For using peritoneal macrophages, 4% thioglycolate-elicited peritoneal macrophages from  
859 *Itga9<sup>MAC+/+</sup>* and *Itga9<sup>MAC $\Delta$  $\Delta$</sup>*  mice were suspended in BrdU-containing RPMI 1640 media that also  
860 contained 10% FBS. 25,000 cells were added to each well since peritoneal macrophages have lower  
861 proliferation rates than VSMCs in culture. 50  $\mu$ g ml<sup>-1</sup> oxLDL was added to the indicated cells at the  
862 beginning of this incubation. An ELISA for incorporated BrdU was then performed using kit  
863 instructions (#6813, Cell Signaling Technologies) after incubation for 36 hr. Adhesion assays were  
864 performed in precoated 96-well plates blocked with 100 mg ml<sup>-1</sup> BSA. Blocking conditions were  
865 empirically derived to minimize non-specific cell adhesion. After a 5 (for THP-1 cells) or 15 (for  
866 VSMCs) min incubation, non-adhered cells were removed by gently centrifuging the plates upside  
867 down. VSMCs were counted manually and THP-1 cells were counted by automated microscopy after  
868 staining cells with DAPI.

869

### 870 **Western blotting assay**

871 Cells were resuspended in serum free media (SFM), and incubated with gentle agitation to prevent cell  
872 attachment and reduce basal signaling. Cells were washed with SFM then seeded on BSA-blocked plates  
873 coated with either BSA, VCAM-1, Svep1, or Svep1<sup>CADrv</sup>. Concentrations of VCAM-1 and Svep1 were  
874 derived empirically to prevent signal saturation. BSA concentrations always matched the Svep1  
875 concentration. It is only appropriate, therefore, to compare between BSA, Svep1, and Svep1<sup>CADrv</sup>  
876 groups. Cells were briefly centrifuged to the bottom of the wells and incubated for 8 min (for VSMCs)  
877 or 15 min (for THP-1 cells) before lysis with cell lysis buffer (#9803, Cell Signaling Technologies)  
878 containing a cocktail of protease and phosphatase inhibitors. Western blots were performed by standard  
879 techniques, as briefly follows. Protein content was determined using a bicinchoninic acid assay with

880 BSA standards (#23225, Pierce™ BCA Protein Assay Kit). Cell lysates were then reduced with DTT in  
881 lithium dodecyl sulfate sample buffer (#NP0007, Invitrogen). Equal protein amounts were added to  
882 polyacrylamide gels (#4561086, BioRad) and electrophoresed prior to transferring to a nitrocellulose or  
883 polyvinylidene fluoride membrane (#1620260, BioRad). Membranes were blocked in 5% BSA/Tris-  
884 Buffered Saline with tween 20 for 30 min. The indicated primary antibodies were incubated with the  
885 pre-blocked membranes for overnight at 4°C. Membranes were washed with Tris-Buffered Saline with  
886 tween 20, probed with fluorescent secondary antibodies, and imaged.  $\beta$ -actin or  $\beta$ -tubulin served as a  
887 loading control.

888

### 889 **Bulk RNA sequencing and analysis**

890 Primary VSMCs were plated on wells precoated with 30  $\mu\text{g ml}^{-1}$  recombinant Svep1, Svep1<sup>CADrv</sup> protein  
891 or BSA (as an inert protein control). Wells were subsequently blocked with 10  $\text{mg ml}^{-1}$  BSA and washed  
892 twice with DPBS. Plates were UV sterilized before adding cells. Primary VSMCs were collected,  
893 resuspended in DMEM/F12 media containing 10% FBS, plated on precoated, blocked wells, and  
894 incubated for 8 hr to ensure complete cell adhesion. Media was replaced with fresh DMEM/F12  
895 containing 1% FBS and incubated for 12 hr before collection. RNA was collected using RNeasy® Mini  
896 Kit (#74106, Qiagen). Atherosclerotic aortic arches (including the aortic root, arch, and the proximal  
897 regions of its branching vessels) from mice were used as the source of RNA for the later RNAseq  
898 experiment. These tissues were isolated and separated from the perivascular adipose prior to storing in  
899 RNAlater (#AM7021, ThermoFisher) prior to total RNA extraction using nucleoZOL (Macherey-Nagel).  
900 cDNA for validation was synthesized with High Capacity cDNA Reverse Transcript Kit (#4368814,  
901 Applied Biosystems), following standard protocols.

902 Samples were prepared according to library kit manufacturer's protocol, indexed, pooled, and sequenced  
903 on an Illumina HiSeq. Basecalls and demultiplexing were performed with Illumina's bcl2fastq software  
904 and a custom python demultiplexing program with a maximum of one mismatch in the indexing read.  
905 RNA-seq reads were then aligned to the Ensembl release 76 primary assembly with STAR version  
906 2.5.1a (Dobin et al., 2013). Gene counts were derived from the number of uniquely aligned  
907 unambiguous reads by Subread:featureCount version 1.4.6-p5 (Liao et al., 2014). Isoform expression of  
908 known Ensembl transcripts were estimated with Salmon version 0.8.2 (Patro et al., 2017). Sequencing  
909 performance was assessed for the total number of aligned reads, total number of uniquely aligned reads,  
910 and features detected. The ribosomal fraction, known junction saturation, and read distribution over  
911 known gene models were quantified with RSeQC version 2.6.2 (Wang et al., 2012). All gene counts

912 were then imported into the R/Bioconductor package EdgeR (Robinson et al., 2010) and TMM  
913 normalization size factors were calculated to adjust for samples for differences in library size.  
914 Ribosomal genes and genes not expressed in the smallest group size minus one sample greater than one  
915 count-per-million were excluded from further analysis. The TMM size factors and the matrix of counts  
916 were then imported into the R/Bioconductor package Limma (Ritchie et al., 2015). Weighted likelihoods  
917 based on the observed mean-variance relationship of every gene and sample were then calculated for all  
918 samples with the voomWithQualityWeights (Liu et al., 2015). The performance of all genes was  
919 assessed with plots of the residual standard deviation of every gene to their average log-count with a  
920 robustly fitted trend line of the residuals. Differential expression analysis was then performed to analyze  
921 for differences between conditions and the results were filtered for only those genes with Benjamini-  
922 Hochberg false-discovery rate adjusted  $P$ -values less than or equal to 0.05. One sample in the aortic arch  
923 experiment was independently identified as an outlier by standard quality control methods. This group  
924 was excluded from downstream analyses.

925 For each contrast extracted with Limma, global perturbations in known Gene Ontology (GO)  
926 terms, KEGG pathways, and InterPro domains were detected using the Database for Annotation,  
927 Visualization and Integrated Discovery (DAVID) (Huang da et al., 2009) on significantly dysregulated  
928 transcripts or using the R/Bioconductor package GAGE (Luo et al., 2009) to test for changes in  
929 expression of the reported log<sub>2</sub> fold-changes reported by Limma in each term versus the background  
930 log<sub>2</sub> fold-changes of all genes found outside the respective term. The R/Bioconductor package  
931 heatmap3 (Zhao et al., 2014) was used to display heatmaps across groups of samples for each GO or  
932 MSigDb term with a Benjamini-Hochberg false-discovery rate adjusted  $p$ -value less than or equal to  
933 0.05. Perturbed KEGG pathways where the observed log<sub>2</sub> fold-changes of genes within the term were  
934 significantly perturbed in any direction compared to other genes within a given term with  $P$ -values less  
935 than or equal to 0.05 were rendered as annotated KEGG graphs with the R/Bioconductor package  
936 Pathview (Luo and Brouwer, 2013).

937

### 938 **Notch signaling assays**

939 Cells were collected, resuspended in SFM, and incubated for 1 hr with gentle agitation before seeding on  
940 tissue culture wells that were precoated and blocked, as described in previous sections. Cells were  
941 collected for analysis after 4 hr of growth on the indicated substrate. *Svep1*<sup>SMC<sup>+/+</sup></sup> and *Svep1*<sup>SMC<sup>Δ/Δ</sup></sup>  
942 VSMCs were collected for analysis after 72 hr of incubation in SFM to obtain basal Notch signaling.  
943 Notch target gene primers used for the qPCR are listed in Supplementary Table 3.

944

945 **Analysis of cytokine and chemokine biomarkers**

946 MILLIPLEX MAP Mouse Cytokine/Chemokine Magnetic Bead Panel-Immunology Multiplex Assay  
947 (#MCTOMAG-70K), MILLIPLEX MAP Mouse Angiogenesis/Growth Factor Magnetic Bead Panel-  
948 Cancer Multiplex Assay (#MAGPMAG-24K), and MILLIPLEX MAP Mouse Cardiovascular Disease  
949 (CVD) Magnetic Bead Panel 1-Cardiovascular Disease Multiplex Assay (#MCVD1MAG-77K-02, all  
950 from Millipore Sigma) were used to analyze cytokines and chemokines from mouse plasma. All kits  
951 were used according to manufacturer recommended protocols. Briefly, the Luminex FLEXMAP 3D®  
952 (Luminex Corporation, Austin, TX) instrument was used to sort the magnetic polystyrene beads and  
953 measure the phycoerythrin (PE) tagged detection antibody signal. Fifty beads from each analyte were  
954 measured. The median fluorescent intensity (MFI) was compared against the standard curve to calculate  
955 the pg ml<sup>-1</sup> or ng ml<sup>-1</sup> using Milliplex Analyst 5.1 software (VigeneTech.com) and a 5-parameter logistic  
956 curve fit algorithm.

957

958 **BMDM isolation and culture**

959 6- to 8-week-old *Itga9*<sup>MAC<sup>+/+</sup></sup> and *Itga9*<sup>MAC<sup>Δ/Δ</sup></sup> mice were euthanized by carbon dioxide inhalation, and  
960 soaked in 75% ethanol. Then, femurs and tibias were harvested and bone-marrow cells were obtained by  
961 flushing bones and differentiated for 7 days in DMEM media supplemented with 50 mg ml<sup>-1</sup>  
962 recombinant macrophage-colony stimulating factor (M-CSF, R&D systems), 20% heat-inactivated FBS,  
963 and antibiotics.

964

965 **Mendelian Randomization**

966 To estimate the causal effect of SVEP1 plasma protein levels on risk of CAD, hypertension, and type 2  
967 diabetes (T2D), we performed Mendelian Randomization using summary statistics from publicly  
968 available datasets. Genome-wide summary statistics for risk of CAD were obtained from a meta-analysis  
969 of CAD using data from CARDIoGRAMPlusC4D and the UK Biobank as previously described (van der  
970 Harst and Verweij, 2018). Genome-wide summary statistics for hypertension and T2D were obtained  
971 from the IEU GWAS database (Hemani et al., 2018) using association results from the UK Biobank.  
972 Summary statistics for primary hypertension (ICD 10 code I10) as a secondary diagnosis (IEU GWAS  
973 ID “ukb-b-12493”) were used for hypertension while summary statistics for diabetes diagnosed by a  
974 doctor (IEU GWAS ID “ukb-b-10753”) were used for T2D.

975 A genome-wide association study to identify protein quantitative trait loci using a SomaLogic  
976 aptamer-based protein assay has previously been described (Sun et al., 2018). Two aptamers  
977 (SVEP1.11109.56.3 and SVEP1.11178.21.3) were used to estimate SVEP1 protein concentration. We  
978 obtained genome-wide summary statistics for both aptamers which produced highly similar results; for  
979 simplicity, results from the analysis using the SVEP1.11178.21.3 aptamer were reported. As trans-  
980 pQTLs might affect protein levels in a variety of manners, we focused our analysis on cis-pQTLs by  
981 only including variants in a 1Mb window surrounding SVEP1 which associated with plasma SVEP1  
982 concentration at a level exceeding genome-wide significance ( $P$ -value for SVEP1 concentration  $< 5 \times$   
983  $10^{-8}$ ). We filtered these SNPs using pair-wise linkage disequilibrium estimated from the 1000 Genomes  
984 Project European samples in order to obtain an independent ( $r^2 < 0.3$ ) set of SNPs for the causal  
985 analysis. Causal estimates were calculated using the inverse-variant weighted method implemented in  
986 the R package TwoSampleMR (Hemani et al., 2017; Hemani et al., 2018).

987

### 988 **Statistical analysis**

989 For animal model data, a two-group independent t-test, one-way analysis of variance (ANOVA), or two-  
990 way ANOVA were used, provided the data satisfied the Shapiro-Wilk normality test. Otherwise, the  
991 Mann-Whitney U test, Kruskal-Wallis one-way ANOVA test, and Friedman two-way ANOVA test were  
992 used. Bonferroni correction was used for post-hoc multiple comparison in ANOVA. Unless otherwise  
993 stated, cellular assays were analyzed by an unpaired, two-tailed t-test. Statistical analyses were  
994 performed with GraphPad Prism.

995

996 **References**

- 997 Andrews, M.R., Czvitkovich, S., Dassie, E., Vogelaar, C.F., Faissner, A., Blits, B., Gage, F.H., ffrench-  
998 Constant, C., and Fawcett, J.W. (2009). Alpha9 integrin promotes neurite outgrowth on tenascin-C and  
999 enhances sensory axon regeneration. *J Neurosci* 29, 5546-5557.
- 1000  
1001 Ayari, H., and Bricca, G. (2013). Identification of two genes potentially associated in iron-heme  
1002 homeostasis in human carotid plaque using microarray analysis. *J Biosci* 38, 311-315.
- 1003  
1004 Basatemur, G.L., Jorgensen, H.F., Clarke, M.C.H., Bennett, M.R., and Mallat, Z. (2019). Vascular smooth  
1005 muscle cells in atherosclerosis. *Nature reviews Cardiology* 16, 727-744.
- 1006  
1007 Bennett, M.R., Sinha, S., and Owens, G.K. (2016). Vascular Smooth Muscle Cells in Atherosclerosis.  
1008 *Circulation research* 118, 692-702.
- 1009  
1010 Boucher, J., Gridley, T., and Liaw, L. (2012). Molecular pathways of notch signaling in vascular smooth  
1011 muscle cells. *Front Physiol* 3, 81.
- 1012  
1013 Burgess, S., Scott, R.A., Timpson, N.J., Davey Smith, G., Thompson, S.G., and Consortium, E.-I. (2015).  
1014 Using published data in Mendelian randomization: a blueprint for efficient identification of causal risk  
1015 factors. *European journal of epidemiology* 30, 543-552.
- 1016  
1017 C Baigent, A.K., P M Kearney, L Blackwell, G Buck, C Pollicino, A Kirby, T Sourjina, R Peto, R Collins,  
1018 R Simes, Cholesterol Treatment Trialists' (CTT) Collaborators (2005). Efficacy and Safety of Cholesterol-  
1019 Lowering Treatment: Prospective Meta-Analysis of Data From 90,056 Participants in 14 Randomised  
1020 Trials of Statins. *Lancet* 366, 1267-1278.
- 1021  
1022 Cangemi, C., Skov, V., Poulsen, M.K., Funder, J., Twal, W.O., Gall, M.A., Hjortdal, V., Jespersen, M.L.,  
1023 Kruse, T.A., Aagard, J., *et al.* (2011). Fibulin-1 is a marker for arterial extracellular matrix alterations in  
1024 type 2 diabetes. *Clin Chem* 57, 1556-1565.
- 1025  
1026 Chen, C., Kudo, M., Rutaganira, F., Takano, H., Lee, C., Atakilit, A., Robinett, K.S., Uede, T., Wolters,  
1027 P.J., Shokat, K.M., *et al.* (2012). Integrin alpha9beta1 in airway smooth muscle suppresses exaggerated  
1028 airway narrowing. *J Clin Invest* 122, 2916-2927.
- 1029  
1030 Chen, P.Y., Qin, L., Li, G., Tellides, G., and Simons, M. (2016). Smooth muscle FGF/TGFbeta cross talk  
1031 regulates atherosclerosis progression. *EMBO molecular medicine* 8, 712-728.
- 1032  
1033 Cherepanova, O.A., Gomez, D., Shankman, L.S., Swiatlowska, P., Williams, J., Sarmiento, O.F., Alencar,  
1034 G.F., Hess, D.L., Bevard, M.H., Greene, E.S., *et al.* (2016). Activation of the pluripotency factor OCT4  
1035 in smooth muscle cells is atheroprotective. *Nat Med* 22, 657-665.
- 1036  
1037 Chistiakov, D.A., Bobryshev, Y.V., and Orekhov, A.N. (2015). Changes in transcriptome of macrophages  
1038 in atherosclerosis. *J Cell Mol Med* 19, 1163-1173.
- 1039  
1040 Danussi, C., Petrucco, A., Wassermann, B., Pivetta, E., Modica, T.M., Del Bel Belluz, L., Colombatti, A.,  
1041 and Spessotto, P. (2011). EMILIN1-alpha4/alpha9 integrin interaction inhibits dermal fibroblast and  
1042 keratinocyte proliferation. *The Journal of cell biology* 195, 131-145.



1043 Davis-Knowlton, J., Turner, J.E., Turner, A., Damian-Loring, S., Hagler, N., Henderson, T., Emery, I.F.,  
1044 Bond, K., Duarte, C.W., Vary, C.P.H., *et al.* (2019). Characterization of smooth muscle cells from human  
1045 atherosclerotic lesions and their responses to Notch signaling. *Lab Invest* 99, 290-304.  
1046  
1047 Deford, P., Brown, K., Richards, R.L., King, A., Newburn, K., Westover, K., and Albig, A.R. (2016).  
1048 MAGP2 controls Notch via interactions with RGD binding integrins: Identification of a novel ECM-  
1049 integrin-Notch signaling axis. *Exp Cell Res* 341, 84-91.  
1050  
1051 Deloukas, P., Kanoni, S., Willenborg, C., Farrall, M., Assimes, T.L., Thompson, J.R., Ingelsson, E.,  
1052 Saleheen, D., Erdmann, J., Goldstein, B.A., *et al.* (2013). Large-scale association analysis identifies new  
1053 risk loci for coronary artery disease. *Nat Genet* 45, 25-33.  
1054  
1055 Dobin, A., Davis, C.A., Schlesinger, F., Drenkow, J., Zaleski, C., Jha, S., Batut, P., Chaisson, M., and  
1056 Gingeras, T.R. (2013). STAR: ultrafast universal RNA-seq aligner. *Bioinformatics* 29, 15-21.  
1057  
1058 Dzau, V.J., Braun-Dullaeus, R.C., and Sedding, D.G. (2002). Vascular proliferation and atherosclerosis:  
1059 new perspectives and therapeutic strategies. *Nat Med* 8, 1249-1256.  
1060  
1061 Fukuda, D., Aikawa, E., Swirski, F.K., Novobrantseva, T.I., Kotelianski, V., Gorgun, C.Z., Chudnovskiy,  
1062 A., Yamazaki, H., Croce, K., Weissleder, R., *et al.* (2012). Notch ligand delta-like 4 blockade attenuates  
1063 atherosclerosis and metabolic disorders. *Proc Natl Acad Sci U S A* 109, E1868-1877.  
1064  
1065 Ghabrial, A.S., and Krasnow, M.A. (2006). Social interactions among epithelial cells during tracheal  
1066 branching morphogenesis. *Nature* 441, 746-749.  
1067  
1068 Gilges, D., Vinit, M.A., Callebaut, I., Coulombel, L., Cacheux, V., Romeo, P.H., and Vigon, I. (2000).  
1069 Polydom: a secreted protein with pentraxin, complement control protein, epidermal growth factor and von  
1070 Willebrand factor A domains. *Biochem J* 352 Pt 1, 49-59.  
1071  
1072 Gupta, S.K., and Vlahakis, N.E. (2010). Integrin alpha9beta1: Unique signaling pathways reveal diverse  
1073 biological roles. *Cell Adh Migr* 4, 194-198.  
1074  
1075 Hakkinen, L., Hildebrand, H.C., Berndt, A., Kosmehl, H., and Larjava, H. (2000). Immunolocalization of  
1076 tenascin-C, alpha9 integrin subunit, and alphavbeta6 integrin during wound healing in human oral mucosa.  
1077 *J Histochem Cytochem* 48, 985-998.  
1078  
1079 Hansson, G.K., and Klareskog, L. (2011). Pulling down the plug on atherosclerosis: cooling down the  
1080 inflammasome. *Nat Med* 17, 790-791.  
1081  
1082 Hemani, G., Tilling, K., and Davey Smith, G. (2017). Orienting the causal relationship between  
1083 imprecisely measured traits using GWAS summary data. *PLoS Genet* 13, e1007081.  
1084  
1085 Hemani, G., Zheng, J., Elsworth, B., Wade, K.H., Haberland, V., Baird, D., Laurin, C., Burgess, S.,  
1086 Bowden, J., Langdon, R., *et al.* (2018). The MR-Base platform supports systematic causal inference across  
1087 the human phenome. *Elife* 7.  
1088  
1089 Huang da, W., Sherman, B.T., and Lempicki, R.A. (2009). Systematic and integrative analysis of large  
1090 gene lists using DAVID bioinformatics resources. *Nature protocols* 4, 44-57.

1091 Huang, X.Z., Wu, J.F., Ferrando, R., Lee, J.H., Wang, Y.L., Farese, R.V., Jr., and Sheppard, D. (2000).  
1092 Fatal bilateral chylothorax in mice lacking the integrin alpha9beta1. *Mol Cell Biol* *20*, 5208-5215.  
1093  
1094 Johnson, J.L. (2014). Emerging regulators of vascular smooth muscle cell function in the development  
1095 and progression of atherosclerosis. *Cardiovascular research* *103*, 452-460.  
1096  
1097 Kalluri, A.S., Vellarikkal, S.K., Edelman, E.R., Nguyen, L., Subramanian, A., Ellinor, P.T., Regev, A.,  
1098 Kathiresan, S., and Gupta, R.M. (2019). Single-Cell Analysis of the Normal Mouse Aorta Reveals  
1099 Functionally Distinct Endothelial Cell Populations. *Circulation* *140*, 147-163.  
1100  
1101 Kanayama, M., Kurotaki, D., Morimoto, J., Asano, T., Matsui, Y., Nakayama, Y., Saito, Y., Ito, K.,  
1102 Kimura, C., Iwasaki, N., *et al.* (2009). Alpha9 integrin and its ligands constitute critical joint  
1103 microenvironments for development of autoimmune arthritis. *J Immunol* *182*, 8015-8025.  
1104  
1105 Karpanen, T., Padberg, Y., van de Pavert, S.A., Dierkes, C., Morooka, N., Peterson-Maduro, J., van de  
1106 Hoek, G., Adrian, M., Mochizuki, N., Sekiguchi, K., *et al.* (2017). An Evolutionarily Conserved Role for  
1107 Polydom/Svep1 During Lymphatic Vessel Formation. *Circulation research* *120*, 1263-1275.  
1108  
1109 Kessler T, Z.L., Liu Z, Yin X, Huang Y, Wang Y, Fu Y, Mayr M, Ge Q, Xu Q, Zhu Y, Wang X, Schmidt  
1110 K, de Wit C, Erdmann J, Schunkert H, Aherrahrou Z, Kong W. (2015). ADAMTS-7 inhibits re-  
1111 endothelialization of injured arteries and promotes vascular remodeling through cleavage of  
1112 thrombospondin-1. *Circulation* *131*, 1191-1201.  
1113  
1114 Langley, S.R., Willeit, K., Didangelos, A., Matic, L.P., Skroblin, P., Barallobre-Barreiro, J., Lengquist,  
1115 M., Rungger, G., Kapustin, A., Kedenko, L., *et al.* (2017). Extracellular matrix proteomics identifies  
1116 molecular signature of symptomatic carotid plaques. *J Clin Invest* *127*, 1546-1560.  
1117  
1118 Levy, D., Ehret, G.B., Rice, K., Verwoert, G.C., Launer, L.J., Dehghan, A., Glazer, N.L., Morrison, A.C.,  
1119 Johnson, A.D., Aspelund, T., *et al.* (2009). Genome-wide association study of blood pressure and  
1120 hypertension. *Nat Genet* *41*, 677-687.  
1121  
1122 Liao, Y., Smyth, G.K., and Shi, W. (2014). featureCounts: an efficient general purpose program for  
1123 assigning sequence reads to genomic features. *Bioinformatics* *30*, 923-930.  
1124  
1125 Liu, B., Pjanic, M., Wang, T., Nguyen, T., Gloudemans, M., Rao, A., Castano, V.G., Nurnberg, S., Rader,  
1126 D.J., Elwyn, S., *et al.* (2018). Genetic Regulatory Mechanisms of Smooth Muscle Cells Map to Coronary  
1127 Artery Disease Risk Loci. *Am J Hum Genet* *103*, 377-388.  
1128  
1129 Liu, R., Holik, A.Z., Su, S., Jansz, N., Chen, K., Leong, H.S., Blewitt, M.E., Asselin-Labat, M.L., Smyth,  
1130 G.K., and Ritchie, M.E. (2015). Why weight? Modelling sample and observational level variability  
1131 improves power in RNA-seq analyses. *Nucleic Acids Res* *43*, e97.  
1132  
1133 Liu, X., and Ntambi, J.M. (2009). Atherosclerosis: keep your macrophages in shape. *Nat Med* *15*, 1357-  
1134 1358.  
1135  
1136 Loubery, S., Seum, C., Moraleda, A., Daeden, A., Furthauer, M., and Gonzalez-Gaitan, M. (2014).  
1137 Uninflatable and Notch control the targeting of Sara endosomes during asymmetric division. *Curr Biol*  
1138 *24*, 2142-2148.

1139 Luo, W., and Brouwer, C. (2013). Pathview: an R/Bioconductor package for pathway-based data  
1140 integration and visualization. *Bioinformatics* 29, 1830-1831.

1141

1142 Luo, W., Friedman, M.S., Shedden, K., Hankenson, K.D., and Woolf, P.J. (2009). GAGE: generally  
1143 applicable gene set enrichment for pathway analysis. *BMC Bioinformatics* 10, 161.

1144

1145 Marchler-Bauer, A., Lu, S., Anderson, J.B., Chitsaz, F., Derbyshire, M.K., DeWeese-Scott, C., Fong, J.H.,  
1146 Geer, L.Y., Geer, R.C., Gonzales, N.R., *et al.* (2011). CDD: a Conserved Domain Database for the  
1147 functional annotation of proteins. *Nucleic Acids Res* 39, D225-229.

1148

1149 Misra, A., Feng, Z., Chandran, R.R., Kabir, I., Rotllan, N., Aryal, B., Sheikh, A.Q., Ding, L., Qin, L.,  
1150 Fernandez-Hernando, C., *et al.* (2018). Integrin beta3 regulates clonality and fate of smooth muscle-  
1151 derived atherosclerotic plaque cells. *Nature communications* 9, 2073.

1152

1153 Mitchell, A.L., Attwood, T.K., Babbitt, P.C., Blum, M., Bork, P., Bridge, A., Brown, S.D., Chang, H.Y.,  
1154 El-Gebali, S., Fraser, M.I., *et al.* (2019). InterPro in 2019: improving coverage, classification and access  
1155 to protein sequence annotations. *Nucleic Acids Res* 47, D351-D360.

1156

1157 Morooka, N., Futaki, S., Sato-Nishiuchi, R., Nishino, M., Totani, Y., Shimono, C., Nakano, I., Nakajima,  
1158 H., Mochizuki, N., and Sekiguchi, K. (2017). Polydom Is an Extracellular Matrix Protein Involved in  
1159 Lymphatic Vessel Remodeling. *Circulation research* 120, 1276-1288.

1160

1161 Mostovich, L.A., Prudnikova, T.Y., Kondratov, A.G., Loginova, D., Vavilov, P.V., Rykova, V.I., Sidorov,  
1162 S.V., Pavlova, T.V., Kashuba, V.I., Zabarovsky, E.R., *et al.* (2011). Integrin alpha9 (ITGA9) expression  
1163 and epigenetic silencing in human breast tumors. *Cell Adh Migr* 5, 395-401.

1164

1165 Nelson, C.P., Goel, A., Butterworth, A.S., Kanoni, S., Webb, T.R., Marouli, E., Zeng, L., Ntalla, I., Lai,  
1166 F.Y., Hopewell, J.C., *et al.* (2017). Association analyses based on false discovery rate implicate new loci  
1167 for coronary artery disease. *Nat Genet* 49, 1385-1391.

1168

1169 Nikpay, M., Goel, A., Won, H.H., Hall, L.M., Willenborg, C., Kanoni, S., Saleheen, D., Kyriakou, T.,  
1170 Nelson, C.P., Hopewell, J.C., *et al.* (2015). A comprehensive 1,000 Genomes-based genome-wide  
1171 association meta-analysis of coronary artery disease. *Nat Genet* 47, 1121-1130.

1172

1173 Nishimichi, N., Higashikawa, F., Kinoh, H.H., Tateishi, Y., Matsuda, H., and Yokosaki, Y. (2009).  
1174 Polymeric osteopontin employs integrin alpha9beta1 as a receptor and attracts neutrophils by presenting  
1175 a de novo binding site. *J Biol Chem* 284, 14769-14776.

1176

1177 Patro, R., Duggal, G., Love, M.I., Irizarry, R.A., and Kingsford, C. (2017). Salmon provides fast and bias-  
1178 aware quantification of transcript expression. *Nat Methods* 14, 417-419.

1179

1180 Rader, D.J., and FitzGerald, G.A. (1998). State of the art: atherosclerosis in a limited edition. *Nat Med* 4,  
1181 899-900.

1182

1183 Randolph, G.J. (2013). Proliferating macrophages prevail in atherosclerosis. *Nat Med* 19, 1094-1095.

1184

1185 Ritchie, M.E., Phipson, B., Wu, D., Hu, Y., Law, C.W., Shi, W., and Smyth, G.K. (2015). limma powers  
1186 differential expression analyses for RNA-sequencing and microarray studies. *Nucleic Acids Res* 43, e47.

1187 Robinson, M.D., McCarthy, D.J., and Smyth, G.K. (2010). edgeR: a Bioconductor package for differential  
1188 expression analysis of digital gene expression data. *Bioinformatics* 26, 139-140.  
1189  
1190 Ross, R. (1996). Genetically modified mice as models of transplant atherosclerosis. *Nat Med* 2, 527-528.  
1191  
1192 Roy, S., Bingle, L., Marshall, J.F., Bass, R., Ellis, V., Speight, P.M., and Whawell, S.A. (2011). The role  
1193 of alpha9beta1 integrin in modulating epithelial cell behaviour. *J Oral Pathol Med* 40, 755-761.  
1194  
1195 Samuelov, L., Li, Q., Bochner, R., Najor, N.A., Albrecht, L., Malchin, N., Goldsmith, T., Grafi-Cohen,  
1196 M., Vodo, D., Fainberg, G., *et al.* (2017). SVEP1 plays a crucial role in epidermal differentiation. *Exp*  
1197 *Dermatol* 26, 423-430.  
1198  
1199 Sato-Nishiuchi, R., Nakano, I., Ozawa, A., Sato, Y., Takeichi, M., Kiyozumi, D., Yamazaki, K.,  
1200 Yasunaga, T., Futaki, S., and Sekiguchi, K. (2012). Polydom/SVEP1 is a ligand for integrin alpha9beta1.  
1201 *J Biol Chem* 287, 25615-25630.  
1202  
1203 Schreiber, T.D., Steinl, C., Essl, M., Abele, H., Geiger, K., Muller, C.A., Aicher, W.K., and Klein, G.  
1204 (2009). The integrin alpha9beta1 on hematopoietic stem and progenitor cells: involvement in cell  
1205 adhesion, proliferation and differentiation. *Haematologica* 94, 1493-1501.  
1206  
1207 Schunkert, H., Konig, I.R., Kathiresan, S., Reilly, M.P., Assimes, T.L., Holm, H., Preuss, M., Stewart,  
1208 A.F., Barbalic, M., Gieger, C., *et al.* (2011). Large-scale association analysis identifies 13 new  
1209 susceptibility loci for coronary artery disease. *Nat Genet* 43, 333-338.  
1210  
1211 Schweisguth, F. (2004). Regulation of notch signaling activity. *Curr Biol* 14, R129-138.  
1212  
1213 Shang, T., Yednock, T., and Issekutz, A.C. (1999). alpha9beta1 integrin is expressed on human  
1214 neutrophils and contributes to neutrophil migration through human lung and synovial fibroblast barriers.  
1215 *J Leukoc Biol* 66, 809-816.  
1216  
1217 Shankman, L.S., Gomez, D., Cherepanova, O.A., Salmon, M., Alencar, G.F., Haskins, R.M., Swiatlowska,  
1218 P., Newman, A.A., Greene, E.S., Straub, A.C., *et al.* (2015). KLF4-dependent phenotypic modulation of  
1219 smooth muscle cells has a key role in atherosclerotic plaque pathogenesis. *Nat Med* 21, 628-637.  
1220  
1221 Shur, I., Socher, R., Hameiri, M., Fried, A., and Benayahu, D. (2006). Molecular and cellular  
1222 characterization of SEL-OB/SVEP1 in osteogenic cells in vivo and in vitro. *J Cell Physiol* 206, 420-427.  
1223  
1224 Smith, L.L., Cheung, H.K., Ling, L.E., Chen, J., Sheppard, D., Pytela, R., and Giachelli, C.M. (1996).  
1225 Osteopontin N-terminal domain contains a cryptic adhesive sequence recognized by alpha9beta1 integrin.  
1226 *J Biol Chem* 271, 28485-28491.  
1227  
1228 Sonnhammer, E.L., and Ostlund, G. (2015). InParanoid 8: orthology analysis between 273 proteomes,  
1229 mostly eukaryotic. *Nucleic Acids Res* 43, D234-239.  
1230  
1231 Stitzel, N.O., Stirrups, K.E., Masca, N.G., Erdmann, J., Ferrario, P.G., Konig, I.R., Weeke, P.E., Webb,  
1232 T.R., Auer, P.L., Schick, U.M., *et al.* (2016). Coding Variation in ANGPTL4, LPL, and SVEP1 and the  
1233 Risk of Coronary Disease. *N Engl J Med* 374, 1134-1144.  
1234

1235 Sun, B.B., Maranville, J.C., Peters, J.E., Stacey, D., Staley, J.R., Blackshaw, J., Burgess, S., Jiang, T.,  
1236 Paige, E., Surendran, P., *et al.* (2018). Genomic atlas of the human plasma proteome. *Nature* 558, 73-79.  
1237  
1238 Sundstrom, J., and Vasan, R.S. (2006). Circulating biomarkers of extracellular matrix remodeling and risk  
1239 of atherosclerotic events. *Curr Opin Lipidol* 17, 45-53.  
1240  
1241 Takeuchi, F., Isono, M., Katsuya, T., Yamamoto, K., Yokota, M., Sugiyama, T., Nabika, T., Fujioka, A.,  
1242 Ohnaka, K., Asano, H., *et al.* (2010). Blood pressure and hypertension are associated with 7 loci in the  
1243 Japanese population. *Circulation* 121, 2302-2309.  
1244  
1245 van der Harst, P., and Verweij, N. (2018). Identification of 64 Novel Genetic Loci Provides an Expanded  
1246 View on the Genetic Architecture of Coronary Artery Disease. *Circulation research* 122, 433-443.  
1247  
1248 Virella, G., and Lopes-Virella, M.F. (2003). Humoral immunity and atherosclerosis. *Nat Med* 9, 243-244;  
1249 author reply 244-245.  
1250  
1251 Wang, L., Wang, S., and Li, W. (2012). RSeQC: quality control of RNA-seq experiments. *Bioinformatics*  
1252 28, 2184-2185.  
1253  
1254 Weber, C., and Noels, H. (2011). Atherosclerosis: current pathogenesis and therapeutic options. *Nat Med*  
1255 17, 1410-1422.  
1256  
1257 Wei Li, M.F., Sekhar P Reddy, Dae-Yeul Yu, Masayuki Yamamoto, Roy L Silverstein (2010). CD36  
1258 Participates in a Signaling Pathway That Regulates ROS Formation in Murine VSMCs. *J Clin Invest* 120,  
1259 3996-4006.  
1260  
1261 Weng, S., Zemany, L., Standley, K.N., Novack, D.V., La Regina, M., Bernal-Mizrachi, C., Coleman, T.,  
1262 and Semenkovich, C.F. (2003). Beta3 integrin deficiency promotes atherosclerosis and pulmonary  
1263 inflammation in high-fat-fed, hyperlipidemic mice. *Proc Natl Acad Sci U S A* 100, 6730-6735.  
1264  
1265 Wirka, R.C., Wagh, D., Paik, D.T., Pjanic, M., Nguyen, T., Miller, C.L., Kundu, R., Nagao, M., Coller,  
1266 J., Koyano, T.K., *et al.* (2019). Atheroprotective roles of smooth muscle cell phenotypic modulation and  
1267 the TCF21 disease gene as revealed by single-cell analysis. *Nat Med* 25, 1280-1289.  
1268  
1269 Xie, G., Zhang, H., Du, G., Huang, Q., Liang, X., Ma, J., and Jiao, R. (2012). Uif, a large transmembrane  
1270 protein with EGF-like repeats, can antagonize Notch signaling in *Drosophila*. *PLoS One* 7, e36362.  
1271  
1272 Young, E.P., and Stitzel, N.O. (2019). Capitalizing on Insights from Human Genetics to Identify Novel  
1273 Therapeutic Targets for Coronary Artery Disease. *Annu Rev Med* 70, 19-32.  
1274  
1275 Zhang, L., and Ward, R.E.t. (2009). uninflatable encodes a novel ectodermal apical surface protein  
1276 required for tracheal inflation in *Drosophila*. *Dev Biol* 336, 201-212.  
1277  
1278 Zhao, S., Guo, Y., Sheng, Q., and Shyr, Y. (2014). Advanced heat map and clustering analysis using  
1279 heatmap3. *Biomed Res Int* 2014, 986048.  
1280
